# Supplementary material for: Identification of FUBP1 as a Long Tail Cancer Driver and Widespread Regulator of Tumor Suppressor and Oncogene Alternative Splicing
Source: PubMed Central journal article supplement — Cell Rep. Author manuscript; Available in PMC 2020 Jun 16. (PMC7297508; doi:10.1016/j.celrep.2019.08.060), 2019-09-24
Supplement: NIHMS1543630-supplement-6.pdf [file NIHMS1543630-supplement-6.pdf]

## Identification of *FUBP1* as a Long Tail Cancer Driver and Widespread Regulator of Tumor Suppressor and Oncogene Alternative Splicing

### Graphical Abstract

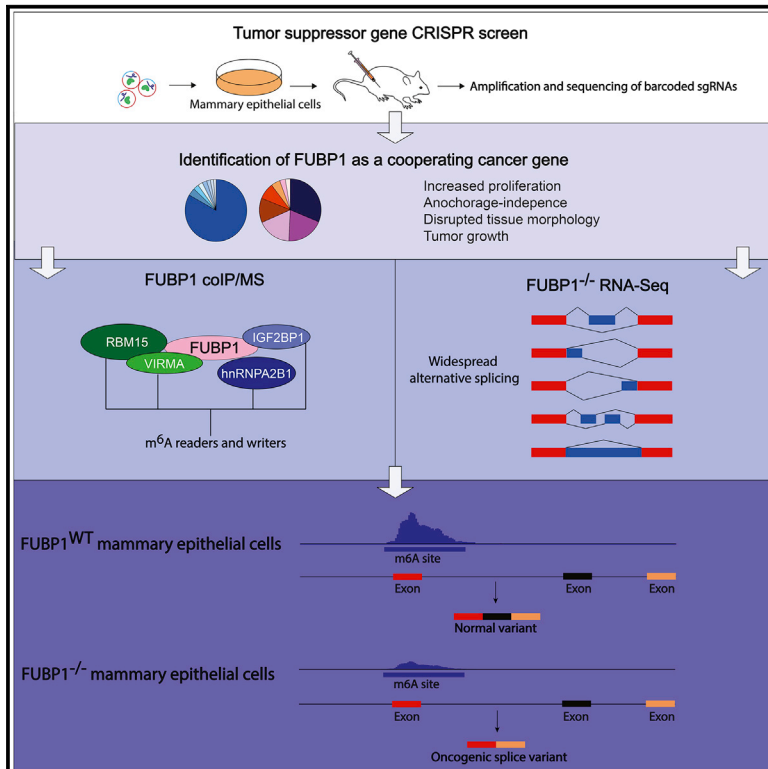

### Authors

Jessica S. Elman, Thomas K. Ni, Kristen E. Mengwasser, Dexter Jin, Ania Wronski, Stephen J. Elledge, Charlotte Kuperwasser

### Correspondence

charlotte.kuperwasser@tufts.edu

### In Brief

Elman et al. identify *FUBP1* as a long tail cancer driver using a combinatorial CRISPR/Cas9 screen. *FUBP1* and *PTEN* cooperate to transform mammary epithelial cells by disrupting cellular differentiation and tissue architecture. *FUBP1*<sup>-/-</sup> cells exhibit decreased m<sup>6</sup>A RNA methylation, leading to widespread expression of aberrant driver isoforms.

### Highlights

- A combinatorial CRISPR screen identifies clinically relevant cooperating cancer genes
- *FUBP1* loss cooperates with *PTEN* loss to promote tumor growth
- *FUBP1*<sup>-/-</sup> cells undergo widespread alternative splicing and reduced m<sup>6</sup>A methylation
- Loss of one gene can alter the transcriptional landscape to promote tumorigenicity

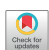

# Identification of *FUBP1* as a Long Tail Cancer Driver and Widespread Regulator of Tumor Suppressor and Oncogene Alternative Splicing

Jessica S. Elman,<sup>1,2</sup> Thomas K. Ni,<sup>1,2</sup> Kristen E. Mengwasser,<sup>5</sup> Dexter Jin,<sup>3,4</sup> Ania Wronski,<sup>1,2</sup> Stephen J. Elledge,<sup>5,6,7</sup> and Charlotte Kuperwasser<sup>1,2,8,\*</sup>

<sup>1</sup>Department of Developmental, Chemical and Molecular Biology, Tufts University School of Medicine, 136 Harrison Ave, Boston, MA 02111, USA

<sup>2</sup>Raymond & Beverly Sackler Convergence Laboratory, Tufts University School of Medicine, 136 Harrison Ave, Boston, MA 02111, USA

<sup>3</sup>Whitehead Institute for Biomedical Research, Cambridge, MA 02142, USA

<sup>4</sup>Department of Biology, Massachusetts Institute of Technology, Cambridge, MA 02139, USA

<sup>5</sup>Division of Genetics, Department of Medicine, Brigham and Women's Hospital, Boston, MA 02115, USA

<sup>6</sup>Ludwig Center at Harvard, Boston, MA, USA

<sup>7</sup>Department of Genetics, Program in Virology, Harvard Medical School, Howard Hughes Medical Institute, Boston, MA 02115, USA

<sup>8</sup>Lead Contact

\*Correspondence: [charlotte.kuperwasser@tufts.edu](mailto:charlotte.kuperwasser@tufts.edu)

<https://doi.org/10.1016/j.celrep.2019.08.060>

## SUMMARY

Comprehensive sequencing approaches have allowed for the identification of the most frequent contributors to cancer, known as drivers. They have also revealed a class of mutations in understudied, infrequently altered genes, referred to as “long tail” (LT) drivers. A key challenge has been to find clinically relevant LT drivers and to understand how they cooperate to drive disease. Here, we identified far upstream binding protein 1 (*FUBP1*) as an LT driver using an *in vivo* CRISPR screen. *FUBP1* cooperates with other tumor suppressor genes to transform mammary epithelial cells by disrupting cellular differentiation and tissue architecture. Mechanistically, *FUBP1* participates in regulating *N*<sup>6</sup>-methyladenosine (m<sup>6</sup>A) RNA methylation, and its loss leads to global changes in RNA splicing and widespread expression of aberrant driver isoforms. These findings suggest that somatic alteration of a single gene involved in RNA splicing and m<sup>6</sup>A methylation can produce the necessary panoply of contributors for neoplastic transformation.

## INTRODUCTION

Within the past decade, tremendous efforts have focused on systematic, genome-wide surveys to identify the most frequently modified genes to distinguish those that drive carcinogenesis from those that are modified because of generalized genomic instability. Results from these tumor sequencing studies indicate that many cancers harbor alterations in only 3–4 known drivers, and ~15% of tumors lack alterations in even a single known driver (Davoli et al., 2013; Garraway and Lander, 2013; Imielinski et al., 2012). In addition, solid tumors arise because of oncogenic

cooperation between alterations of multiple drivers (Fearon and Vogelstein, 1990; Hanahan and Weinberg, 2000). These considerations strongly suggest that there are many drivers yet to be identified that are altered at low frequencies in cancer (Bailey et al., 2018; Lawrence et al., 2014; Liu et al., 2006; Merid et al., 2014; Tokheim et al., 2016). Although these long tail (LT) driver genes are difficult to identify because they are mutated at frequencies only slightly greater than those for passenger genes, knowledge of how they affect major signaling pathways controlling growth and proliferation is critical for understanding and treating cancer based on its genetic underpinnings.

It has been challenging to identify cooperating cancer genes (CCGs) from analysis of existing collections of tumor sequence data. They are underpowered because of the relatively few tumors for many tumor types (Bailey et al., 2018; Lawrence et al., 2014; Liu et al., 2006; Merid et al., 2014; Tokheim et al., 2016). In addition, extreme levels of tissue-specificity exist with respect to drivers of cell proliferation and survival regulation in cells (Haigis et al., 2019; Sack et al., 2018; Schneider et al., 2017); therefore, the precise tissue of interest must be examined in the organism of interest. Because of this, functional approaches, such as insertional mutagenesis, using transposon-based screens in mice, have been used to identify CCGs. For example, genes that may cooperate with *PTEN*, *SMAD4*, or *BRAF* for tumorigenesis have been identified with Sleeping Beauty or piggyBac mutator systems (Ni et al., 2013; de la Rosa et al., 2017; Takeda et al., 2016). However, for breast cancer, mouse and human tissues differ markedly in their genetic requirements for transformation (Perlman, 2016), which has limited the extent to which insertional mutagenesis studies directly model human breast cancer and can be used functionally identify CCGs. A method to functionally identify cooperating genetic lesions in human breast cancers is needed. Therefore, we have developed a combinatorial loss-of-function screen to identify putative tumor suppressor genes (TSGs) whose cooperation is selected for by promoting tumorigenesis *in vivo*. We show that a top hit, *FUBP1*, is an LT gene that cooperates with *PTEN* as

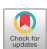

a powerful driver of neoplastic transformation. Furthermore, via regulation of RNA N<sup>6</sup>-methyladenosine (m<sup>6</sup>A) methylation, FUBP1 globally affects the landscape of alternative splicing to create aberrant proteins that drive malignant transformation.

## RESULTS

### Identification of Cooperating TSGs in an *In Vivo* Loss-of-Function CRISPR-Cas9 Screen

We created a unique resource to screen for functionally relevant LT drivers in an unbiased manner: a small genetic library targeting genes that are clinically altered in cancer and thus strongly enriched for high-priority candidates. For loss-of-function screening, a “TSG” library, comprising the 500 genes that are most significantly affected by loss of function in human cancers according to the Tumor Suppressor and Oncogene (TUSON) Explorer algorithm (Davoli et al., 2013) in a lentiviral CRISPR-Cas9 format, was developed. This library has already been used in conjunction with an oncogene open reading frame (ORF) library to investigate how cancer drivers interact in an *in vitro* screen, revealing a spectrum of TSGs and oncogenes that can genetically interact and substitute for one another to modify the behavior of cancer cells with disrupted EGFR signaling (Liao et al., 2017). Additionally, the same libraries have been used *in vitro* to identify TSGs and oncogenes that may similarly substitute for BRD4-NUT, the complex of an epigenetic factor BRD4 and the protein NUT that cause oncogenic signaling and tumor growth, particularly in NUT midline carcinoma (Liao et al., 2018).

To screen for preferentially cooperating LT drivers, we created a sub-library of 100 TSGs with 10 single guide RNAs (sgRNAs) per each targeted gene (Figure 1A; Table S1). MCF10F cells (immortalized, non-transformed human mammary epithelial cells) were transduced with the pooled library at a multiplicity of infection (MOI) of 3, to ensure that most cells received at least two sgRNAs. This strategy enabled us to interrogate approximately  $1 \times 10^6$  different sgRNA combinations, targeting an average of three putative TSGs in each cell. Infected cells were orthotopically implanted into the inguinal mammary glands of immunocompromised non-obese diabetic/and severe combined immunodeficiency (NOD-SCID) mice and monitored for tumor growth. All mice developed tumors, and tumors larger than 5 cm<sup>3</sup> were randomly sampled for histology, whereas the remainder of the tumor was sequenced. Numerous growth patterns were observed within and across the H&E-stained tumors, including squamous, metaplastic, and papillary carcinomas (Figure 1B). We also detected variable expression of biomarkers and hormone-receptor expression common in human tumors, recapitulating clinical presentations of heterogeneous human breast cancers (Figures 1C and S1). This intra- and inter-tumor heterogeneity mirrors clinical cancers and is consistent with different combinations of genetic drivers influencing tumor phenotype (Marusyk et al., 2012).

Sequencing the recovered sgRNAs from the tumors' genomic DNA revealed that the tumors were clonally diverse and identified expected as well as unexpected CCGs (Figure 1D; Table 1). We noted that well-established cancer drivers clinically validated by sequencing of patient breast cancers (PTEN, RB,

p53, NF2, SMAD4, WT1, RUNX1, GATA3, MAP3K1, MLLT4, NCOR1) cooperated with genes that have yet to be shown to be functional cancer drivers (FUBP1, TRIP12, KDM5C, ARID1B) in the breast. Among the unexpected CCGs, far upstream binding protein 1 (FUBP1), a gene previously uncharacterized in breast cancer, was a recurring hit in multiple breast tumors and appeared to cooperate with multiple established drivers (PTEN, RB, p53). Given its stark contribution to tumor formation in the screen and its understudied role in breast cancer, we focused on elucidating the role of FUBP1 as an LT driver and how concurrent deletion of PTEN may enhance its role in cancer.

To examine the clinical relevance of concurrent loss of FUBP1 and PTEN, as well as other CCGs from the screen, we interrogated public tumor datasets (Cerami et al., 2012; Gao et al., 2013). We found that FUBP1 alterations tend to significantly ( $p < 0.001$ ) co-occur with PTEN alterations, as well as alterations in RB1, TP53, CDH1, and KDM5C, across many cancer types, including glioblastoma and lung squamous cell carcinoma, as well as breast-invasive carcinoma (Figure 1E). These correlations lend further validity to the screen as a method of identifying TSGs that preferentially cooperate to drive cancer.

FUBP1 is a single-stranded DNA and RNA-binding protein best known for its role as a positive regulator of c-MYC in normal hematopoiesis (Duncan et al., 1994; Zhou et al., 2016). FUBP1 is also a regulator of post-transcriptional events, such as translation, mRNA stability, and splicing (Hwang et al., 2018; Jacob et al., 2014; Zhang and Chen, 2013). FUBP1 has been isolated in association with spliceosomal complexes (Hwang et al., 2018; Irwin et al., 1997; Jacob et al., 2014; Li et al., 2013; Lin et al., 2009; Miro et al., 2015) and includes four K homology domains, which are homologous to heterogeneous nuclear ribonucleoprotein K, a component of the spliceosomal H complexes (Benjamin et al., 2008; Braddock et al., 2002). Its role in splicing has only recently begun to be understood. Depending on context, FUBP1 can either enhance or suppress splicing (Hwang et al., 2018; Jacob et al., 2014; Li et al., 2013). In patients, FUBP1 missense, nonsense, and silent mutations, as well as whole-gene deletions, frameshift deletions, and insertions are observed in cancers, such as those of the central nervous system and intestinal cancer (Bailey et al., 2018; Bettgowda et al., 2011; Malz et al., 2009; Rabenhorst et al., 2009; Sahm et al., 2012; Singer et al., 2009; Zhang et al., 2013). Despite the biochemical roles of FUBP1, it is unclear how its alteration may affect transformation or cancer pathogenesis.

### FUBP1 Loss Drives Several Characteristic Features of Transformation and Cooperates with PTEN Loss to Promote Tumor Growth *In Vivo*

We used CRISPR-Cas9 to generate FUBP1-, PTEN-, and PTEN/FUBP1-null MCF10F cells using two different sgRNAs targeting FUBP1 to assess how loss of the genes individually or in combination might affect features of transformation. Western blot analysis validated complete loss of FUBP1 and/or PTEN in MCF10F cells (Figures 2A and S2). Loss of FUBP1 or PTEN alone or in combination significantly increased cellular proliferation compared with the non-targeting control (NTC) (Figures 2B and S2). Although there was occasional colony formation of PTEN null cells on soft agar, loss of FUBP1 in combination with

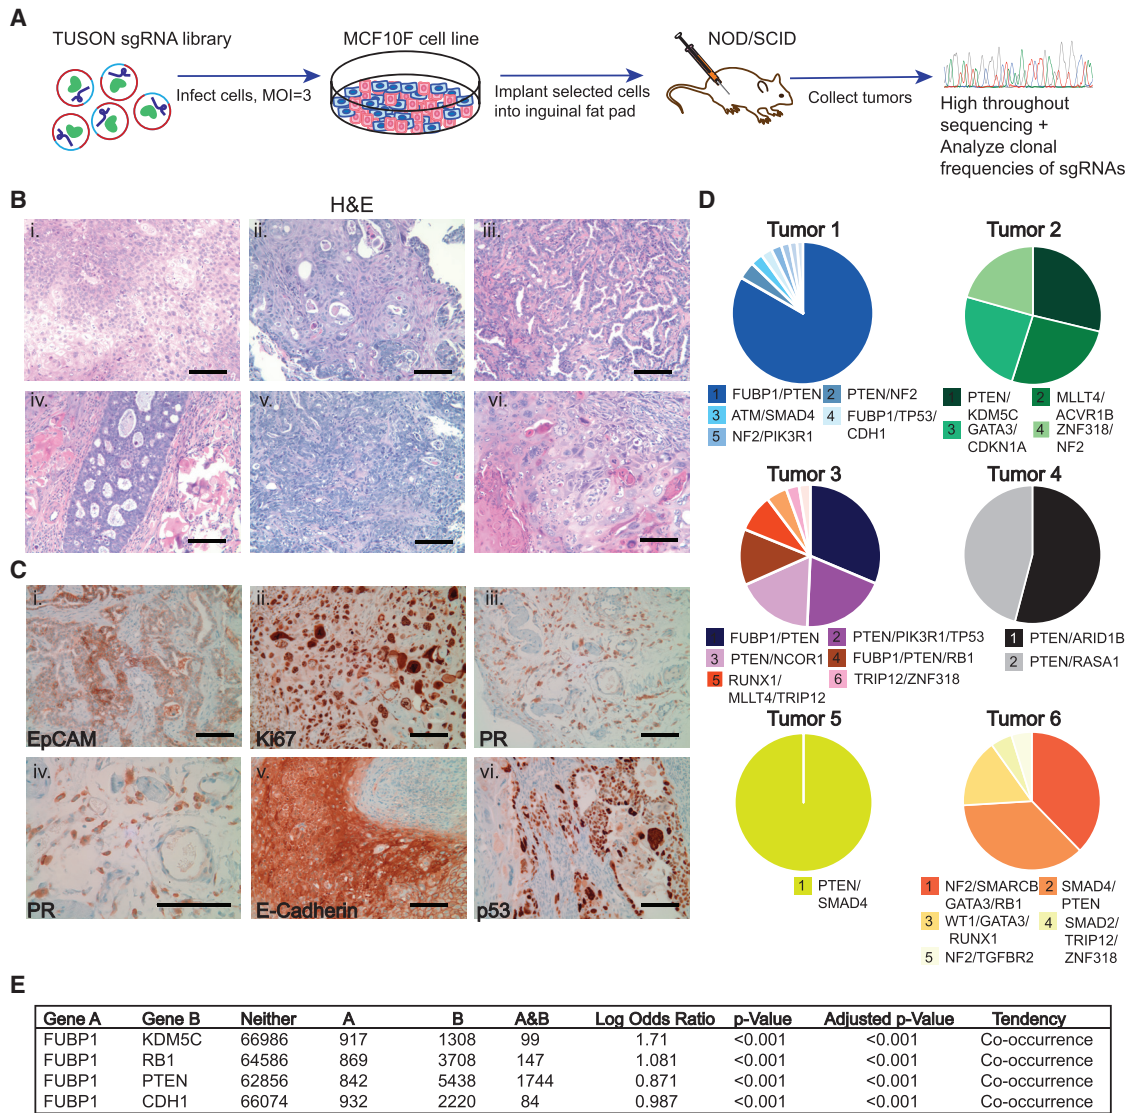

**Figure 1. Identification of Cooperating TSGs in an *In Vivo* Loss-of-Function CRISPR-Cas9 Screen**

(A) Experimental schema for CRISPR-Cas9 library *in vivo* screen for cooperating TSGs. The library was packaged in lentivirus used to infect MCF10F cells at an MOI = 3. Cells were selected for expression of the library and implanted into NOD-SCID mammary fat pads at  $1 \times 10^6$  cells per gland. Tumors were excised and sequenced for analyses.

(B) H&E staining of tumors for identification of histological phenotypes: squamous (i and v), metaplastic (ii), papillary (iii and vi), and adenocarcinoma (iv).

(C) Immunohistochemistry (IHC) staining of tumors for identification of specific epithelial and proliferation markers: EpCAM (i), Ki67 (ii), PR(20 $\times$ ) (iii), PR(40 $\times$ ) (iv), E-cadherin (v), p53 (vi). Scale bars represent 100  $\mu$ m. Magnification = 20 $\times$  for microscope images.

(D) Pie charts representing the clonal heterogeneity and dominant contributing and/or cooperating TSGs in the tumors. Each chart represents one tumor; each slice of each pie chart represents a subclone.

(E) Mutual exclusivity analysis of *FUBP1* (gene A) and tumor suppressor genes that cooperated with *FUBP1* in the screen (gene B) across 69,310 human cancer samples in 233 studies using cBioPortal. “Neither” represents the number of samples in which neither gene A nor B was altered. “A” represents the number of samples in which only gene A is altered. “B” represents the number of samples in which only gene B was altered. “A&B” represents the number of samples in which both genes A and B were altered.

*PTEN* led to the most significant increase in anchorage-independent colony formation on soft agar (Figures 2C, 2D and S2).

Because loss of tissue architecture is a hallmark of transformation, we seeded cells in 3D hydrogels to assess the role of *FUBP1* on tissue morphogenesis and differentiation. *FUBP1*-, *PTEN*-, and *PTEN/FUBP1*-null MCF10F cells were grown in

collagen-based hydrogels (Miller et al., 2017; Sokol et al., 2016) supplemented with extracellular matrix components and allowed to grow for 10 days (Figures 2E and S2). In this assay, the cells grew into different types of 3D tissues with varying degrees of structural complexity. We classified the growths based on morphology, presence of CK14<sup>+</sup> basal and CK8/18<sup>+</sup> luminal

**Table 1. Co-occurring sgRNAs Identified in Tumor Subclones**

|            | Tumor 1                | Tumor 2              | Tumor 3            | Tumor 4              | Tumor 5             | Tumor 6                  |
|------------|------------------------|----------------------|--------------------|----------------------|---------------------|--------------------------|
| Subclone 1 | FUBP1, PTEN            | PTEN, KDM5C          | FUBP1, PTEN        | PTEN, ARID1B         | SMAD4, PTEN         | NF2, SMARCB1, GATA3, RB1 |
| Subclone 2 | PTEN, NF2              | MLLT4, ACVR1B        | PTEN, PIK3R1, TP53 | PTEN, RASA1          | PTEN, CDKN2A        | SMAD4, PTEN              |
| Subclone 3 | FUBP1, TP53, CDH1      | ZNF318, NF2          | PTEN, NCOR1        | STAG2, SMARCB1, PTEN | PIK3R1, NF2         | WT1, GATA3, RUNX1        |
| Subclone 4 | ATM, SMAD4             | GATA3, CDKN1A        | RB, PTEN, FUBP1    | KDM5C                | BAP1, RASA1, TRIP12 | SMAD2, TRIP12, ZNF318    |
| Subclone 5 | NF2, PIK3R1            | APC, RNP43           | RNX1, MLLT4        | KDM6A, ZNF318        | HLA-B, RBM10        | NF2, TGFBP2              |
| Subclone 6 | CDKN2A1, TGFBP2, DMK5C | CRIPAK, ASXL1, AJUBA | TRIP12, ZNF318     | FBXW7, TP53, PTEN    |                     | SMARCA4, ARHGAP35        |
| Subclone 7 | CREBBP, STK11, SMAD4   |                      | FUBP, KDM5C, PTEN  | PIK3R1, MLLT4, NCOR1 |                     | ARID2, RB1               |

mammary epithelial cells, and integrity of cellular polarity (basal cells surrounding luminal cells). The 3D outgrowths were classified into the following morphologically distinct groups: normal glandular tissue with conserved organization of cells (T1), normal structure but loss of polarity (T2), disrupted structure and loss of either basal cells or luminal cells (T3), and complete loss of structure with significantly diminished numbers of basal cells (T4) (Figures 2E and S2). We found that most control cells grow as normal T1 and T2 structures, whereas the loss of *PTEN*, *FUBP1*, or the combination of *PTEN/FUBP1* caused a significant increase in the number of abnormal T3 and T4 structures. *PTEN* loss led to the preferential formation of T3 structures, whereas *FUBP1* loss alone or in combination with *PTEN* was associated with the development of disrupted T4 structures (Figures 2E and S2). Thus, *FUBP1* loss affected 3D tissue organization, basal differentiation, and cellular polarity, including a significant loss of basal cells.

To determine whether loss of *FUBP1* alone or combined with the loss of *PTEN* promotes tumorigenic behavior *in vivo*, *FUBP1*-, *PTEN*-, or *FUBP1/PTEN*-null MCF10F cells were implanted into the inguinal mammary glands of NOD-SCID mice. Within 2 weeks, all mice implanted with *FUBP1/PTEN*-deficient cells had formed tumors, whereas *FUBP1*-null or *PTEN*-null cells did not (Figures 2F and 2G). Gross and microscopic examination of the *PTEN/FUBP1*-deficient tumors revealed expansive, angiogenic, cystic tumors containing widespread inflammation and abnormal mitoses (Figure 2H). Collectively, these findings demonstrate that cells with the loss of *FUBP1* alone and in combination with *PTEN* exhibit classic hallmarks of transformation, including increased proliferation, anchorage-independent growth, and loss of tissue architecture, and they form tumors *in vivo*.

### ***FUBP1* Loss Causes Widespread Alternative Splicing and Processing of Cancer Driver Genes**

To determine how *FUBP1* loss contributes to neoplastic transformation, gene expression profiling was performed by RNA sequencing (RNA-seq) in cells deficient for *FUBP1* (Figure S3). There were a number of differentially expressed genes between the *FUBP1*-null and NTC cells, ~25% of which were noncoding

RNA transcripts (ncRNA). Gene set enrichment analysis (GSEA) of differentially expressed genes revealed a strong negative enrichment for the epithelial-to-mesenchymal transition (EMT)-related genes (*TGFB1*, *SNAI2*, *MFAP5*), consistent with the loss of basal cells in *FUBP1*-null cells. Given previous findings showing that *FUBP1* can promote *MYC* activation (Duncan et al., 1994; He et al., 2000), we also examined whether *FUBP1* deficiency might be affecting *MYC* expression and/or downstream *MYC* signaling. However, consistent with a recent report (Seiler et al., 2018), we did not see a significant reduction in *MYC* expression levels in cells lacking *FUBP1*.

Accumulating evidence shows that alternative splicing has a key role in cancer pathogenesis; we and others (Lee et al., 2018; Ni and Kuperwasser, 2016) have shown that that mRNA splicing and processing creates genes and proteins that act as functional cancer drivers. Given that previous work has implicated *FUBP1* as a splicing regulator (Hwang et al., 2018; Jacob et al., 2014), we were interested in determining whether *FUBP1* loss might be affecting alternative splicing and processing (AS) events that would be leading to upregulation of variant mRNA transcripts. Applying replicative multivariate analysis of splicing (rMATS 4.0.1) to the RNA-seq data, we found more than 10,000 differential AS events between the NTC and *FUBP1*-null MCF10F cells, ~60% of which are unannotated splicing events. Across the differential splice events, 70% were skipped exons (SEs), 16% mutually exclusive exons (MXEs), 7% alternative 3'-splice sites (A3SS), 6% alternative 5'-splice sites (A5SS), and 1% retained intron events (RIs) (Figure 3A). We used the Database for Annotation, Visualization, and Integrated Discovery (DAVID) (Huang et al., 2009a, 2009b) to functionally cluster the AS transcripts most significantly expressed differentially to begin to understand the global consequences of these AS events. Many of the alternatively spliced genes in *FUBP1*-null cells were involved in mRNA processing, cell cycle, and DNA damage repair (Figure 3B), which might signal potential vulnerabilities of tumors bearing *FUBP1* mutations.

There is increasing interest in understanding how mRNA events, such as AS, can be as potent as DNA mutation events in driving tumorigenesis. In human breast cancer and chronic lymphocytic leukemia (CLL), recurrent, truncated mRNAs caused

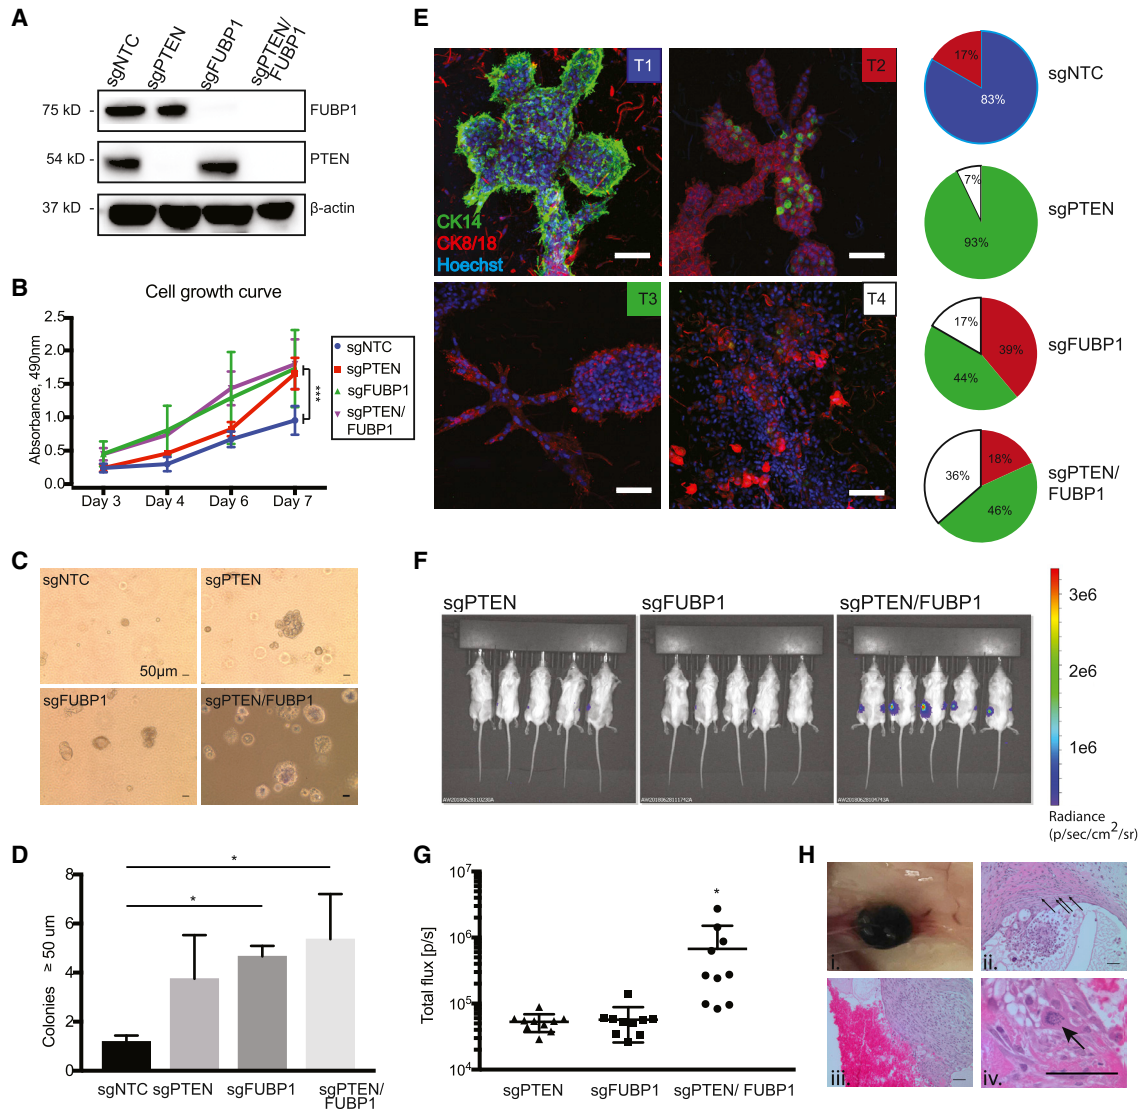

**Figure 2. FUBP1 Loss Drives Several Characteristic Features of Transformation and, with PTEN Loss, Promotes Tumor Growth In Vivo**

(A) Western blot of lysates from MCF10F cells transduced with NTC, PTEN, FUBP1, or PTEN+FUBP1 CRISPR-Cas9 sgRNA to show knockout of corresponding genes.

(B) Proliferation of the indicated cell lines over 7 days, measured by MTS assay, analyzed with an ANOVA with a multiple-comparisons test.

(C) Soft agar growth assays for the indicated cell lines. Images show representative soft agar fields for the indicated cell lines after 2 weeks. Scale bar represents 50  $\mu\text{m}$ . Analyzed with one-way ANOVA with a multiple comparisons test against sgNTC.

(D) Quantification of soft agar colonies in the indicated cell lines after 2 weeks.

(E) Representative immunofluorescent (IF) images of the indicated cell lines after 10 days in hydrogels. Green, CK14<sup>+</sup>; red, CK8/18<sup>+</sup>. Nuclei stained with Hoechst (blue). Scale bars represent 100  $\mu\text{m}$ . Pie charts represent quantification of 3D tissue morphology, cellular polarity, and expression. Blue sections represent T1 structures, red represent T2, green represent T3, and white represent T4.

(F) Bioluminescence imaging was used to detect tumor growth in NOD-SCID mice injected with the indicated cell lines (n = 5 mice per cell line, 5  $\times$  10<sup>6</sup> cells injected per gland).

(G) Quantification of bioluminescence emitted from each injected gland at 2 weeks after injection.

(H) Gross and microscopic detection of tumor growth in NOD-SCID gland injected with PTEN/FUBP1-null MCF10F cells. Images depict highly vascularized tumors (i) with angiogenesis and inflammation (ii and iii), as well as an abnormally mitotic cell (iv). Scale bars represent 50  $\mu\text{m}$ . Data are presented as means  $\pm$  SEM, n = 3 biological replicates per cell line. \*p < 0.05, \*\*\*p < 0.0005 (two-tailed Student's t tests unless otherwise indicated).

by intronic polyadenylation affect genes with tumor-suppressive functions and can give rise to oncoproteins (Lee et al., 2018; Ni and Kuperwasser, 2016; Ni et al., 2018). In FUBP1-null cells, 11

genes with tumor-suppressive functions were found to be truncated by AS (Figure 3C). Three FUBP1 AS targets were the same recurrent variants found in human CLL: DICER, MGA,

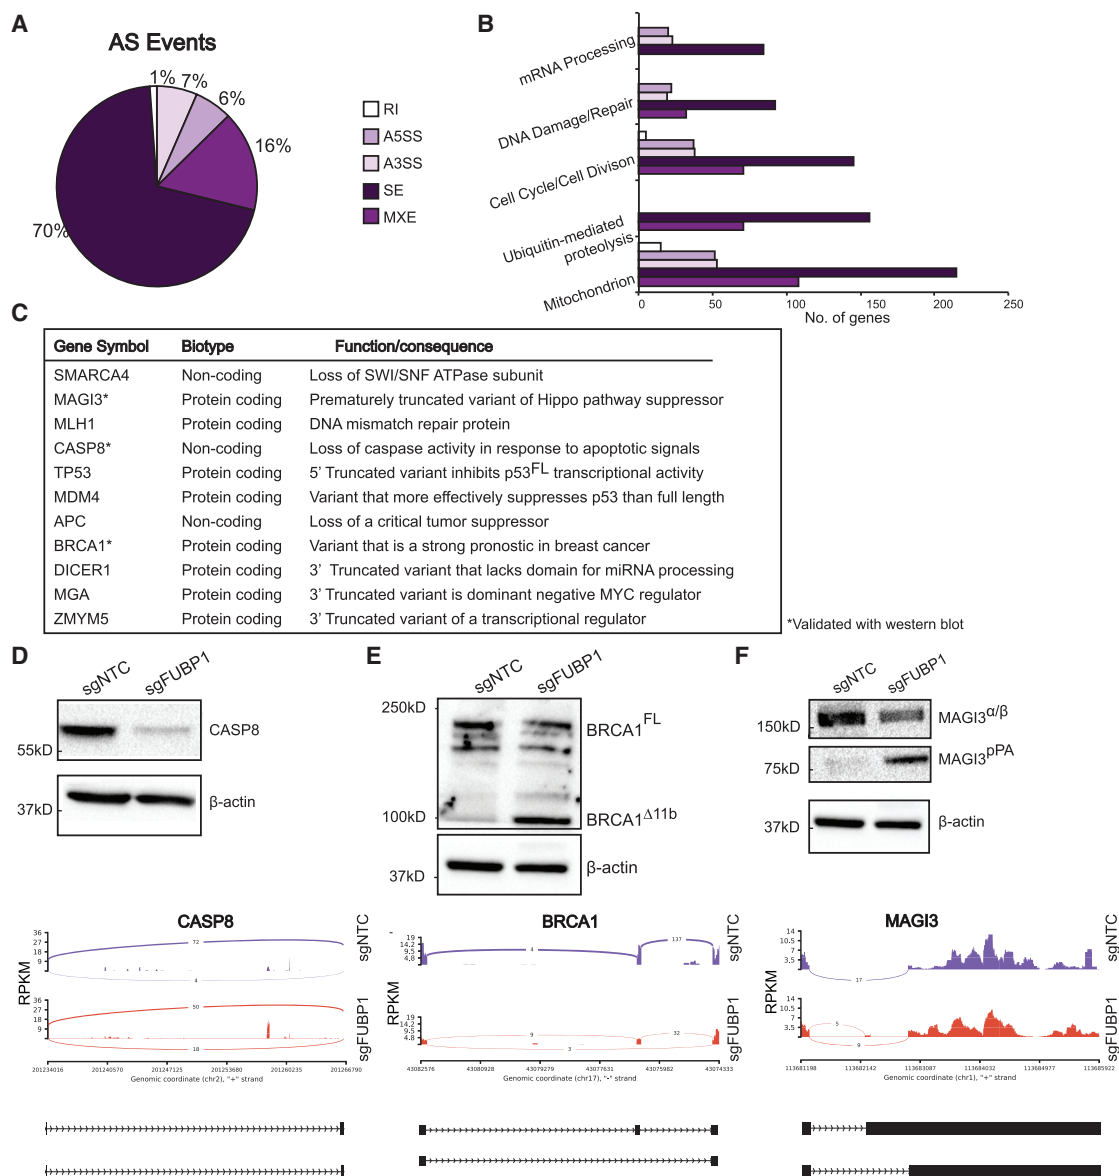

**Figure 3. FUBP1 Promotes Alternative Splicing of Cancer Driver Genes**

(A) rMATS 4.0.1 used for detection of alternative splicing events in *FUBP1*-null cells. Pie chart shows distribution of A5'-splice site (A5SS), A3'-splice site (A3SS), skipped exon (SE), retained intron (RI), and mutually exclusive exon (MXE) splice events.

(B) Enrichment of functions of alternatively spliced genes detected by rMATS, performed by DAVID functional annotation analysis.

(C) Summary of cancer genes that are alternatively spliced in *FUBP1*-null cells, indicating gene name, biotype, and summary of function.

(D–F) Western blots of NTC and *FUBP1*-null cell lysates for CASP8 (D), BRCA1 (E), and MAGI3 (F) and corresponding sashimi plot of alternative splicing. Blot for BRCA1 was stripped and re-probed for MAGI3. In sashimi plots, y axis represents a modified reads per kilobase of transcript (RPKM), per a million mapped reads. Peaks report number of junction reads. Below each, cartoon representations of alternative isoforms: exons and introns are not drawn to scale and represented as black rectangles and lines, respectively.

and *ZMYM5* (Lee et al., 2018) (Figures S4A–S4C). Our analyses revealed that 11% of *DICER1* transcripts, 61.5% of *MGA* transcripts, and 28.5% of *ZMYM5* transcripts undergo AS to generate aberrantly A3'-spliced isoforms. The prematurely truncated form of *DICER1* encodes for a protein that is unable to process microRNA (miRNA), leading to reduced functional DICER protein and altered miRNA processing (Lee et al., 2018). The pre-

maturely truncated form of *MGA* creates a dominant-negative regulator of full-length *MGA* to act as an oncoprotein (Lee et al., 2018). Additionally, in concordance with previous reports showing that *FUBP1* acts as a splicing regulatory factor for the oncogene *MDM2*, we also detected that *FUBP1*-null cells exhibit AS of *MDM2*, leading to a 4-fold increase in the expression of *MDM2-ALT2*, an alternative variant reported to increase cyclin

**Table 2. FUBP1 Splicing Targets Conserved across Breast and Brain**

| Splice Event | Gene Names                                                                       |
|--------------|----------------------------------------------------------------------------------|
| A3SS         | SLC43A3, FUS, ZBED5, RESP1, KIAA1529, ABI2                                       |
| A5SS         | C6orf48, TPM1, IARS, SEC31A, FASTK, SLC43A3, ITF81, KCNK2, SKA2, ALDH18A1, UBAP2 |
| SE           | MYL6, FUS, MYL6B, CAPN2, UBC, SCARB1, DALRD3, FAM72D, BATS                       |
| RI           | None                                                                             |
| MXE          | Data Not Available                                                               |

D1 to promote malignancy (Jacob et al., 2014) (Figure S4D). Other FUBP1 targets include Caspase8 (*CASP8*), which undergoes alternative A3' splicing, resulting in a non-functional transcript (Figure 3D). *CASP8* is an important regulator of apoptosis, and the loss of functional *CASP8* may result in a classic hallmark of cancer, evasion of apoptosis (Stupack, 2013). Western blotting for *CASP8* revealed a complete loss of *CASP8* protein in *FUBP1*-null cells, and the corresponding Sashimi plot shows that, although there are 18 raw junction read counts for the A3'-spliced *CASP8* transcript in the *FUBP1*-null samples, there are only four in the NTC (Figure 3D).

FUBP1 also targets the tumor suppressor *BRCA1*, a gene notoriously linked to breast and ovarian cancers (Figure 3E). *FUBP1*-null cells strongly overexpress a *BRCA1* variant, *BRCA1*<sup>Δ11b</sup>, which lacks most of exon 11, the large internal exon that contains the nuclear localization signal (NLS) and the RAD51 binding domain, and it is the mutational hotspot in a large fraction of *BRCA1* mutation carriers (Miki et al., 1994; Wilson et al., 1997). Previous work has shown that *BRCA1*<sup>Δ11b</sup>-expressing cells have diminished double-stranded break repair (Huber et al., 2001; Westermarck et al., 2003). We used immunoblotting to validate that the ~100-kDa *BRCA1*<sup>Δ11b</sup> is expressed in the *FUBP1*-null, but not the NTC, cells.

Additionally, the oncogenic, prematurely truncated *MAGI3* transcript *MAGI3*<sup>ppA</sup> is strongly expressed in the *FUBP1*-null, but not the NTC, cells (Figure 3F). The full-length *MAGI3*<sup>FL</sup> is a TSG and a regulator of the Hippo signaling pathway that normally binds and inactivates YAP to prevent tissue overgrowth and other behaviors characteristic of cancer (Ni and Kuperwasser, 2016). The prematurely truncated form, *MAGI3*<sup>ppA</sup>, is unable to bind YAP, thus promoting classic oncogenic behavior (Ni and Kuperwasser, 2016). Validation of *CASP8*, *MAGI3*, and *BRCA1* AS events was also performed with *FUBP1*-null cells generated with an alternative sgRNA, confirming those changes were not off-target events (Figures S2F–S2H).

We also assessed the effects of *FUBP1* loss on AS in an additional nontumorigenic mammary epithelial cell line, MCF10A (Figure S5A). Similar to the *FUBP1*-null MCF10F cells, *FUBP1*-null MCF10A cells showed a complete loss of *CASP8* protein, compared with the NTC (Figure S5B). Unlike the MCF10F cells, however, the *FUBP1*-null MCF10A cells showed no difference in protein expression or splicing of *MAGI3* or *BRCA1* (Figures S5C and S5D). Interestingly, the NTC MCF10A cells exhibited a striking baseline expression of the aberrant isoforms *MAGI3*<sup>ppA</sup> and *BRCA1*<sup>Δ11b</sup>. This may be because the MCF10A cell line is

more stem-like (Qu et al., 2015) or perhaps because they already contain mutations in other genes that are important for splicing regulation.

To further expand our investigation beyond the mammary epithelium, we surveyed splicing data from cancers that harbor *FUBP1* loss-of-function (LoF) mutations as well as splicing changes in the human glioma cell line U87MG, in which *FUBP1* was inhibited with small interfering RNA (siRNA) (Seiler et al., 2018). We found an overlap of *FUBP1* splicing targets in primary human brain cancers as well as in *FUBP1*-knockdown U87MG cells with *FUBP1*-null MCF10F. Of the 307 conserved alternatively spliced genes between the *FUBP1*-null MCF10F cells, primary glioma samples and siFUBP1 U87MG cells, 26 were significant (Table 2). Several of those overlapping genes were A3SS, A5SS, and SE splicing events (false discovery rate [FDR] < 0.05). Taken together, these results support *FUBP1* as an important regulator of AS and indicate that *FUBP1* targets include cancer genes that are truncated or otherwise altered to drive malignant transformation.

#### **FUBP1 Loss Leads to a Reduction in m<sup>6</sup>A Modification Upstream of FUBP1-Regulated Splice Sites**

To further investigate the mechanism by which *FUBP1* controls AS events, we next performed co-immunoprecipitation (coIP) of V5-tagged *FUBP1* followed by mass spectrometry (MS) to identify binding partners of *FUBP1* that may participate in the regulation of mRNA processing (Table S2). We found significant enrichment for proteins involved in RNA splicing, mRNA processing and transport, as well as other regulators of translation ( $p \leq 0.01$ ) (Figure S6A; Table S3) with clusterProfiler (Yu et al., 2012) on the proteins that uniquely co-immunoprecipitated with *FUBP1*. This is consistent with previous reports of *FUBP1* as a nucleic acid-binding protein and regulator of AS (Hwang et al., 2018; Jacob et al., 2014; Li et al., 2013; Miro et al., 2015).

Among the set of *FUBP1*-interacting proteins identified by coIP/MS, we also identified several regulators of the mRNA methylation modification m<sup>6</sup>A, including RBM15, IGF2BP1, hnRNPA2B1, and VIRMA (Figure S6B). RNA binding motif 15 (RBM15) has been implicated as an RNA-binding protein that is involved with m<sup>6</sup>A machinery important in recruiting m<sup>6</sup>A core catalytic proteins (Patil et al., 2016). Protein Virilizer Homolog (VIRMA) is similarly a key component of the m<sup>6</sup>A methyltransferase that has a role in recruiting the core catalytic components METTL3, METTL14, and WTAP (Yue et al., 2018). We confirmed the presence of a protein-protein interaction between RBM15 and VIRMA, as well as other members of the m<sup>6</sup>A reactome with *FUBP1* (Figure 4A). We additionally probed for the m<sup>6</sup>A methyltransferase (methyltransferase-like protein 3 [METTL3]), and found that it co-immunoprecipitates with V5-tagged *FUBP1*, although not as strongly as with RBM15 and VIRMA (Figure 4A). Given these findings, we hypothesized that *FUBP1* recruits RBM15 and/or VIRMA, which then recruit METTL3 to form the methyltransferase complex that ultimately methylates target mRNA sites.

To determine whether expression of *FUBP1* affects mRNA m<sup>6</sup>A levels, we performed dot-blot assays with mRNA from NTC and *FUBP1*-null cells. Interestingly, we found that loss of *FUBP1* results in a modest, but reproducible, decrease in global



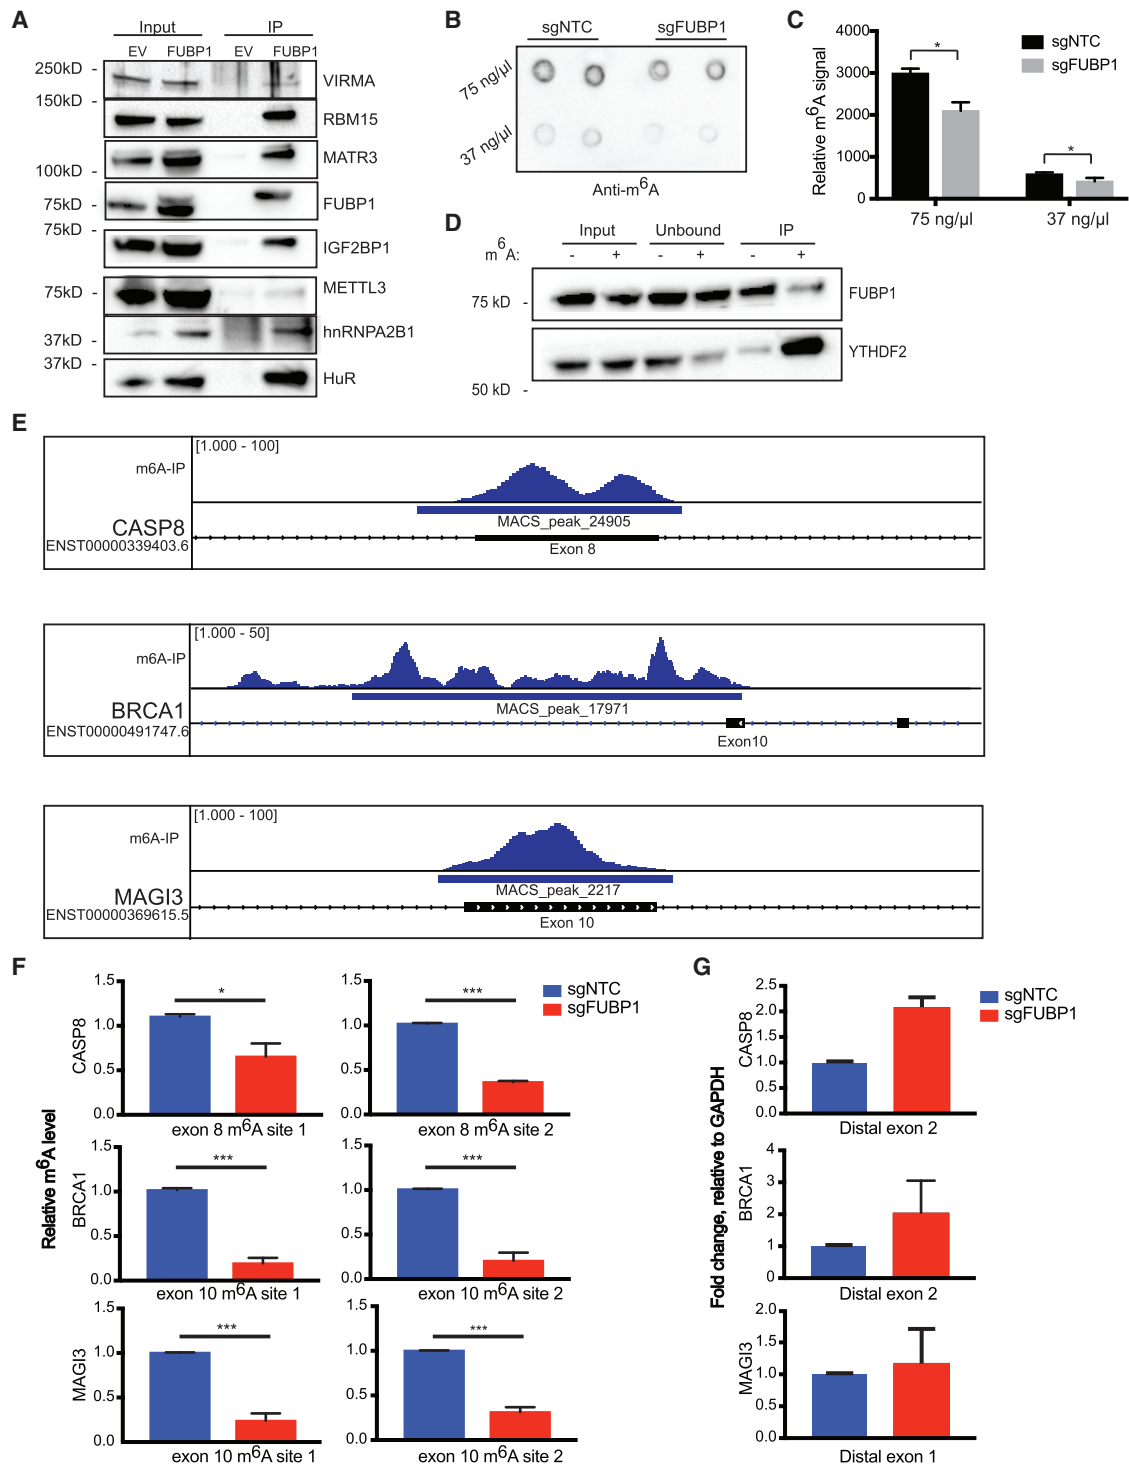

**Figure 4. Exons Upstream of FUBP1-Regulated Splice Sites Exhibit Diminished m<sup>6</sup>A Levels in FUBP1-Null Cells**

(A) Western blot validation of significant proteins from IP/MS experiment.

(B and C) Dot blot measuring global m<sup>6</sup>A levels in mRNA of indicated cell lines (B), quantified in (C).

(D) RNA-IP with m<sup>6</sup>A-modified or non-modified RNA bait followed by immunoblotting for a *bona fide* m<sup>6</sup>A reader, YTHDF2, and FUBP1.

(E) Distribution of m<sup>6</sup>A-seq peaks across the *CASP8*, *BRCA1*, and *MAGI3* loci, based on analysis of previously published m<sup>6</sup>A-seq data in HepG2 cells. The locations of the putative m<sup>6</sup>A sites are indicated within exons directly upstream of splice sites yielding AS transcripts found in *FUBP1*-null cells.

(legend continued on next page)

m<sup>6</sup>A-modified mRNA, compared with the NTC (Figures 4B and 4C). Given that finding, we next investigated whether FUBP1 might also be recognizing and binding m<sup>6</sup>A-modified mRNA. We performed immunoprecipitations with biotinylated RNA baits with or without m<sup>6</sup>A modification, followed by probing for FUBP1 as well as a bona fide m<sup>6</sup>A-binding protein, YTHDF2 (Wang et al., 2015). Our results show that FUBP1 binds to both m<sup>6</sup>A-methylated and non-methylated RNAs (Figure 4D), suggesting that FUBP1 may participate in bringing the m<sup>6</sup>A machinery to its intended site to promote methylation, but not that FUBP1 is specifically recognizing and binding methylated sites.

Given these findings, we next investigated whether FUBP1 acts as an m<sup>6</sup>A effector of AS. Recently, we reported that m<sup>6</sup>A has a role in regulating the formation of AS isoforms of various TSGs, including *MAGI3*, *BRCA1*, and *LATS1* (Ni et al., 2018). If FUBP1 is acting as an m<sup>6</sup>A effector of AS, then m<sup>6</sup>A marks might be enriched within large internal exons of the FUBP1 splicing targets. To test that, we analyzed an available transcriptome-wide m<sup>6</sup>A-sequencing dataset (GEO Database: GSE37005) generated in the human hepatocellular carcinoma HepG2 cell line to identify enrichment of m<sup>6</sup>A peaks in exons upstream of splice sites in FUBP1-regulated transcripts (Dominiis et al., 2013a). We indeed found a concordance between m<sup>6</sup>A peak and splice-site localization (Figures 4E and S7). We found significant enrichment for m<sup>6</sup>A in exon 8 of *CASP8*, upstream of the splice site that results in the formation of the non-coding *CASP8* transcript upregulated in *FUBP1*-null cells. Examination of m<sup>6</sup>A-seq peaks in *BRCA1* also revealed strong enrichment in exon 10, upstream of exon 11, which is skipped in the *BRCA1*<sup>Δ11b</sup> isoform. There was also a strong m<sup>6</sup>A signal in exon 10 of *MAGI3*, which we previously showed to be related to the formation of the oncogenic, truncated *MAGI3*<sup>pPA</sup> (Ni et al., 2018). Given that *FUBP1*-null cells exhibit a global decrease in m<sup>6</sup>A deposition and increased AS, these data suggest that it is possible that the same splice variants affected by *FUBP1* loss may be regulated by m<sup>6</sup>A deposition in exons directly upstream of their splice sites.

To investigate whether the splice variants affected by *FUBP1* loss are indeed regulated by m<sup>6</sup>A modifications in exons upstream of their splice sites, we used an m<sup>6</sup>A antibody to perform RNA immunoprecipitation (RIP) on fragmented mRNA from NTC and *FUBP1*-null MCF10F cells. Relative methylation levels of exons upstream of FUBP1-regulated splice sites were determined by quantitative real-time PCR (Figure 4F). We found significantly decreased m<sup>6</sup>A methylation levels in two m<sup>6</sup>A consensus sites in exon 8 of *CASP8*, two m<sup>6</sup>A sites in exon 10 of *BRCA1*, and two m<sup>6</sup>A sites in exon 10 of *MAGI3* in *FUBP1*-null cells, compared with the NTC cells. Additionally, we performed quantitative real-time PCR on total RNA from NTC and *FUBP1*-null cells with primers flanking regions without m<sup>6</sup>A sites that were distal from the exons of interest for each gene (Figure 4G). We detected that the NTC and *FUBP1*-null cells did not express

significantly different levels of *CASP8*, *BRCA1*, or *MAGI3* mRNA, indicating that the decreases in m<sup>6</sup>A in the exons upstream of the splice sites of interest were not simply due to a decrease in expression of the genes overall. Altogether, these data suggest that the loss of *FUBP1* results in decreased m<sup>6</sup>A in regions that may be important for the regulation of mRNA splicing. Further work to examine how inhibiting or genetically deleting other components of the m<sup>6</sup>A complex affects the splicing of these and other genes is warranted to solidify the significance of these proteins in AS.

### FUBP1 and Other m<sup>6</sup>A-Associated Proteins Are Altered in Human Breast Cancers

We next assessed the mutational frequency and copy number variations (CNVs) of *FUBP1* in ~3,000 human breast cancer clinical samples using the Molecular Taxonomy of Breast Cancer International Consortium (METABRIC) dataset, generated from a long-term study of 2,509 breast tumors and 548 matched normal samples (Cerami et al., 2012; Gao et al., 2013; Pereira et al., 2016). Not surprisingly, ~6% of human breast tumors assessed have alterations in *FUBP1*, in concordance with the low alteration rate of LT drivers (Figure 5A). We found that, in contrast to canonical drivers like *PTEN*, which are mostly affected by deep deletions in cancer, *FUBP1* alterations in these breast tumor samples include a range of alterations, including amplifications, as well as decreased mRNA levels. This may be due to the multiple roles *FUBP1* has been shown to have in cancer, ranging from both activating *MYC* and negatively regulating its expression (Hsiao et al., 2010) to participating in a variety of post-transcriptional events.

Since our findings suggest that FUBP1 contributes to tumorigenicity by participating in m<sup>6</sup>A RNA methylation to regulate AS, we speculated that other genes involved in this modification might also be altered in breast cancer. Thus, we examined the frequency of mRNA and CNVs in FUBP1 binding partners as well as other m<sup>6</sup>A regulators (Figure 5B). *VIRMA* has copy number or significant changes to mRNA levels in more than 20% of the human breast tumors assessed, whereas other FUBP1 binding partners, *RBM15* and *IGFBP2*, are altered in breast cancers at frequencies similar to FUBP1. Given those findings, we extended the analysis to other m<sup>6</sup>A modifiers. Indeed, alterations in other m<sup>6</sup>A readers, writers, and erasers are present in breast cancer at frequencies similar to *FUBP1*, suggesting they too may represent LT drivers. Like *FUBP1*, these genes undergo both amplifications and deep deletions, suggesting that their alteration in either direction may alter a homeostatic balance needed for the complex to function properly. The significance of such alterations in these m<sup>6</sup>A regulators will require further investigation to determine the extent of their contribution to malignant transformation. Cumulatively, however, these data reveal that alterations in the effectors of the m<sup>6</sup>A modification are clinically relevant in human breast cancers, strongly supporting the

(F) Relative m<sup>6</sup>A levels at m<sup>6</sup>A consensus sites of *CASP8*, *BRCA1*, and *MAGI3* in exons upstream of splice sites that yield alternative variants, determined by m<sup>6</sup>A RIP-qPCR in NTC and *FUBP1*-null MCF10F cells.

(G) *CASP8*, *BRCA1*, and *MAGI3* mRNA levels relative to *GAPDH* determined by quantitative real-time PCR in NTC and *FUBP1*-null MCF10F cells (n = 2) using primers flanking the regions distal from splice sites, not surrounding m<sup>6</sup>A consensus sites. Data are presented as means ± SEM, n = 3 biological replicates per cell line. \*p < 0.05 (two-tailed Student's t tests), unless otherwise stated.

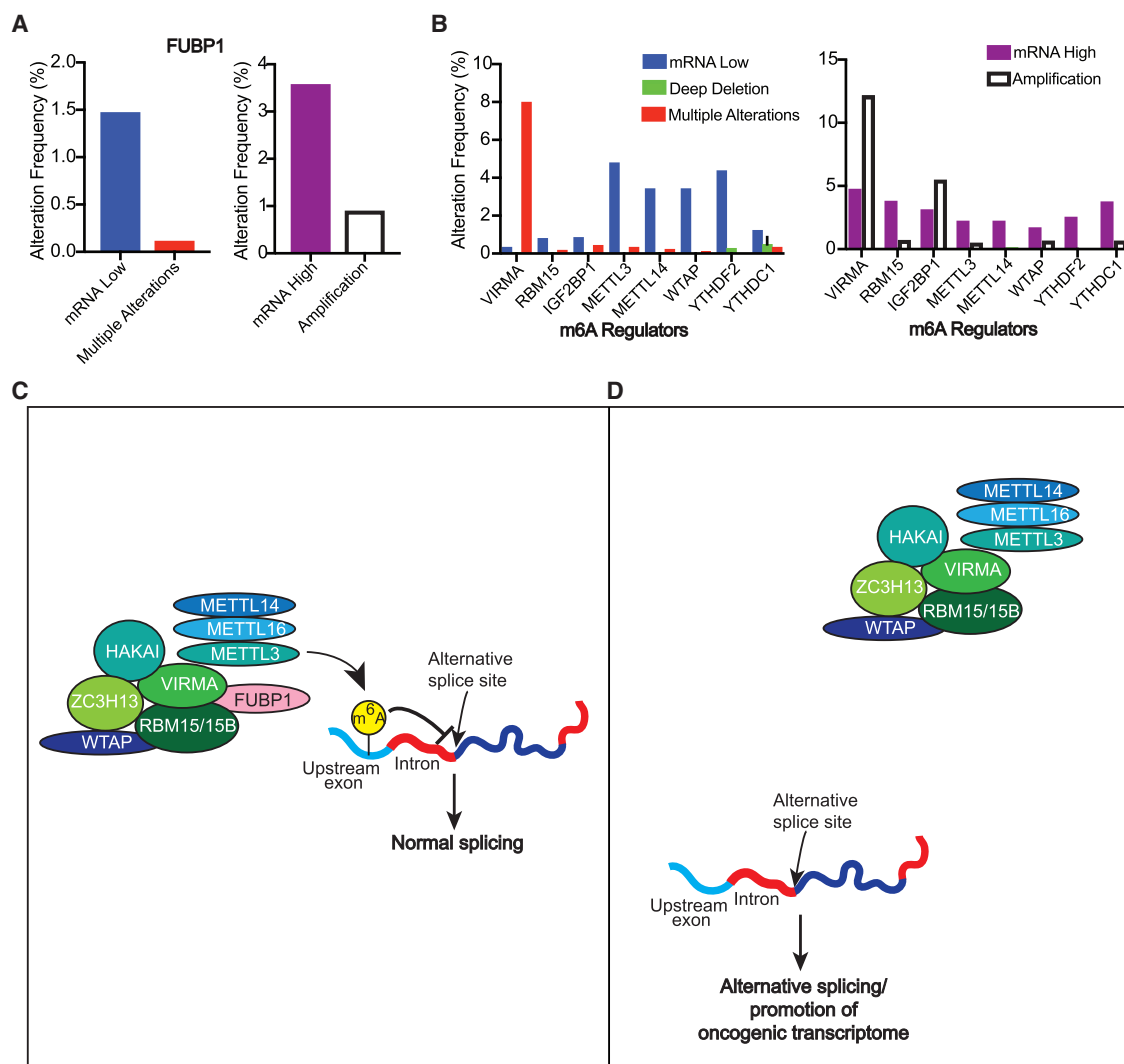

**Figure 5. FUBP1 and Other m<sup>6</sup>A-Associated Proteins that Are Altered in Human Breast Cancers**

(A and B) Percentage of breast cancer samples with (A) low (left) or high (right) copy number or mRNA alterations in FUBP1 or (B) other m<sup>6</sup>A-related genes, reported by METABRIC (2,509 samples).

(C and D) Schematic representation of FUBP1 mechanism in regulating alternative splicing: FUBP1 binds VIRMA and RBM15 to help recruit the rest of the m<sup>6</sup>A complex to target mRNA sites that affect splicing of cancer drivers (C). In the context of FUBP1 loss (D), there are fewer m<sup>6</sup>A modifications, thus preventing the interaction of normal m<sup>6</sup>A-binding proteins with modified sites and their downstream effects, i.e., AS of cancer driver genes.

theory that disrupting this process is a key driver of human breast cancer.

## DISCUSSION

Tumor sequencing studies have enabled the identification of the most potent drivers of cancer, which have been the focus of intense study and represent major therapeutic targets in cancer medicine. The strategies used to discover these drivers are limited, however, because they focus on identifying genes based on their frequency of alteration. Here, we set out to discover understudied, less-frequently mutated drivers, which have been referred to as the “long tail” cancer drivers (Armenia et al., 2018; Cho et al., 2016; Leiserson et al., 2015; Wood

et al., 2007). We employed an unbiased combinatorial screen for preferentially CCGs in a mouse xenograft model of breast cancer using a TSG sgRNA library at a high MOI to ensure multiple alterations per cell. This created an environment in which cells with multiple genetic alterations competed for clonal dominance *in vivo* after orthotopic implantation into murine inguinal fat pads. This study uncovered multiple TSGs that showed genetic cooperativity with drivers such as *PTEN*, including *FUBP1*, a regulator of RNA modification and alternative splicing that affected multiple cancer-driver genes.

RNA splicing presents an opportunity for the expression of differentially configured transcripts that may be exploited by the cell to affect proliferation and survival. Examples of the dysregulation of splicing from cancer-promoting mutations in

splicing factors, such as SF3B1 (Brinkman, 2004; Climente-González et al., 2017; Seiler et al., 2018; Venables, 2006), has captured the attention of the cancer researchers and brought the role of splicing in cancer to the forefront of cancer research. Modifications of mRNA with the potential to influence splicing patterns are also gaining attention. Research on the most abundant RNA modification, m<sup>6</sup>A, has intensified in the past decade (Dominissini et al., 2013a; Meyer and Jaffrey, 2014, 2017; Meyer et al., 2015). The effect of m<sup>6</sup>A levels on translation, degradation, and AS is far-reaching and has consequences in processes ranging from circadian rhythms to cancer (Dai et al., 2018; Fustin et al., 2013; Hastings, 2013; Jaffrey and Kharas, 2017; Pan et al., 2018). Most frequently found in large internal exons and the 3' UTR, the m<sup>6</sup>A marks are well positioned for regulating alternative polyadenylation and AS (Meyer et al., 2012). There have been specific examples of m<sup>6</sup>A binding proteins directly regulating splicing. For instance, through association with SRSF3 and SRSF10, YTHDC1 binds m<sup>6</sup>A-modified mRNA to influence AS (Xiao et al., 2016). In addition, we have previously shown that reduced m<sup>6</sup>A marks are associated with the shortening of the MAGI3 (Ni et al., 2018).

In this study, we discovered *FUBP1* among the most significant hits in the screen in cooperation with other TSGs, most frequently *PTEN*. We validated that loss of *FUBP1*, alone and in combination with *PTEN*, promotes classic malignant phenotypes, including hyperproliferation, anchorage-independent growth, and alteration of 3D tissue architecture. Furthermore, concurrent loss of *PTEN* and *FUBP1* induced *in vivo* tumor growth. Analysis of human tumor datasets across many cancer types revealed that *FUBP1* significantly co-occurs with *PTEN* as do the other *PTEN* cooperating genes from our screen, further validating our genetic approach.

We found that loss of *FUBP1* resulted in the generation of ~10,000 AS events affecting a variety of cancer-related genes, such as *BRCA1*, *MAGI3*, *CASP8*. The *FUBP1*-regulated spliced form of *BRCA1*, *BRCA1*<sup>Δ11b</sup>, is missing most of exon 11 (Raponi et al., 2014; Tammaro et al., 2012; Wang et al., 2016), an alternatively spliced isoform that results in the functional loss of *BRCA1*. Therefore, creating this variant has significant implications for DNA repair, accumulation of mutational burden, and potential therapeutic approaches, such as the use of PARP inhibitors, which are known to be toxic to *BRCA1* mutant cells (Deng and Scott, 2000; Hill et al., 2014; Nacson et al., 2018; Wang et al., 2016; Xu et al., 1999). *FUBP1*-null MCF10F cells also express a variant form of *MAGI3*, *MAGI3*<sup>pPA</sup>, which we previously showed codes for an active oncoprotein that inhibits its full-length form (Ni and Kuperwasser, 2016). When present in excess, *MAGI3*<sup>pPA</sup> binds *MAGI3*<sup>FL</sup> and promotes the nuclear translocation of YAP, a Hippo pathway transcription factor that drives tissue overgrowth and malignant transformation. The *MAGI3*<sup>pPA</sup> variant is recurrent and physiologically relevant in human breast cancers because it occurs in 7.2% of primary breast tumors (Ni and Kuperwasser, 2016). We also identified that *FUBP1*-null cells generate an aberrant form of *CASP8* mRNA that is noncoding, resulting in loss of *CASP8* protein. Dysregulated apoptosis is a classic hallmark of human cancer (Hanahan and Weinberg, 2000), so the implications of losing a regulator of apoptosis are widespread. In breast cancer, especially, loss of

*CASP8* has been shown to contribute to tumorigenicity and correlates with unfavorable outcomes (Mistry et al., 2006; Pu et al., 2017; Yin et al., 2010). As a tumor suppressor, *FUBP1* acts analogously to classical epigenetic TSGs that alter the overall architecture of the transcriptional landscape. In this case, however, *FUBP1* alters the post-transcriptional landscape in a profound manner to cooperate to drive tumorigenesis.

Although *FUBP1* loss led to cell-type-specific AS of target genes, we observed that 8.5% of *FUBP1*-target genes are conserved among the AS events in both mammary epithelium and brain. This frequency is similar to the rate of *FUBP1*-target genes conserved between si*FUBP1*-U87MG cell line and primary glioma tumors with *FUBP1* LoF (7.1%). As such, this suggests that the loss of *FUBP1* results in consistent and generalizable AS changes across different tissue types but also shows profound tissue-specific differences. Further studies are needed to understand the significance of individual *FUBP1*-regulated AS events to tumorigenesis in a tumor- and tissue-specific manner.

In addition, we demonstrated that *FUBP1* co-immunoprecipitates with members of the m<sup>6</sup>A complex and that *FUBP1* loss results in decreased m<sup>6</sup>A levels. In parallel with these findings, we commissioned previously published m<sup>6</sup>A-seq databases to identify enrichment of m<sup>6</sup>A levels in exons directly upstream of *FUBP1*-regulated AS sites. Based on our results, we propose a mechanism for *FUBP1* in cancer: through binding RBM15 and VIRMA, *FUBP1* helps to recruit the rest of the methyltransferase complex to allow for m<sup>6</sup>A deposition on intended RNA sites (Figure 5C). Because of *FUBP1* loss, there are fewer m<sup>6</sup>A modifications, thus preventing the interaction of normal m<sup>6</sup>A-binding proteins with modified sites and their downstream effects, i.e., AS of cancer driver genes (Figure 5D). In addition, we found that several members of the m<sup>6</sup>A complex, including *FUBP1* binding partners, are altered in human breast cancer. Although, individually, these are also rarely mutated and represent LT genes, collectively, they represent a significant genetic alteration that is present across many breast cancers at rates comparable to major drivers. The consequences of these copy number alterations with respect to tumorigenesis will need to be explored in the future.

In sum, our findings demonstrate *FUBP1* loss significantly alters a large collection of genes that contribute to cancer pathogenesis. We have identified *FUBP1* to be an LT driver of breast cancer and have shown that manipulating it alone has powerful implications for the role of AS factors as the gatekeepers to the hallmarks of cancer. Our analyses suggest that genes involved in AS encompass an underappreciated mechanism of oncogenic transformation, and with deeper understanding of their targets and role in cancer, such genes might represent prominent clinical targets.

## STAR★METHODS

Detailed methods are provided in the online version of this paper and include the following:

- KEY RESOURCES TABLE
- LEAD CONTACT AND MATERIALS AVAILABILITY

- **EXPERIMENTAL MODELS AND SUBJECT DETAILS**
  - Cell Lines and Tissue Culture
  - Mice and Orthotopic Tumor Growth Studies
- **METHOD DETAILS**
  - CRISPR-Cas9 Tumor Suppressor Library Screen
  - Cellular proliferation and soft agar assays
  - 3D Hydrogel Seeding and Analyses
  - Protein isolation for immunoblotting, immunoprecipitation, and mass spectrometry
  - Dot blot assays, and m<sup>6</sup>A IP-IB assays
  - RNA isolation and RNA-seq
  - m<sup>6</sup>A-RIP qPCR
- **QUANTIFICATION AND STATISTICAL ANALYSIS**
  - RNA-Seq Analyses
  - Clinical Data Analysis
  - Statistical Analysis
- **DATA AND CODE AVAILABILITY**

### SUPPLEMENTAL INFORMATION

Supplemental Information can be found online at <https://doi.org/10.1016/j.celrep.2019.08.060>.

### ACKNOWLEDGMENTS

This work was supported by funding from the Raymond & Beverly Sackler Convergence Laboratory and grants from the FTC Breast Cancer Foundation (to C.K.), the Breast Cancer Research Foundation (to C.K.), and the NIH/NICHD HD073035 and NIH/NCI CA170851 grants (to C.K.). S.J.E. was funded by a grant from the Cancer Research UK Grand Challenge and the Mark Foundation For Cancer Research to the SPECIFICANCER team and a grant from the Ludwig Foundation. S.J.E. is an investigator with the Howard Hughes Medical Institute.

### AUTHOR CONTRIBUTIONS

Conceptualization, J.S.E., T.K.N., K.E.M., S.J.E., and C.K.; Methodology, J.S.E., K.E.M., C.K., and S.J.E.; Investigation, J.S.E. and A.W.; Formal Analysis, J.S.E., T.K.N., and D.X.J.; Writing – Review & Editing, J.S.E., S.J.E., and C.K.; Funding Acquisition, J.S.E., S.J.E., and C.K.; Supervision, S.J.E. and C.K.

### DECLARATION OF INTERESTS

C.K. is a shareholder of Naveris, Inc., and a member of its scientific board of advisors.

Received: November 9, 2018  
Revised: June 10, 2019  
Accepted: August 20, 2019  
Published: September 24, 2019

### REFERENCES

Armenia, J., Wankowicz, S.A.M., Liu, D., Gao, J., Kundra, R., Reznik, E., Chaitila, W.K., Chakravarty, D., Han, G.C., Coleman, I., et al.; PCF/SU2C International Prostate Cancer Dream Team (2018). The long tail of oncogenic drivers in prostate cancer. *Nat. Genet.* **50**, 645–651.

Bailey, M.H., Tokheim, C., Porta-Pardo, E., Sengupta, S., Bertrand, D., Weerasinghe, A., Colaprico, A., Wendl, M.C., Kim, J., Reardon, B., et al.; MC3 Working Group; Cancer Genome Atlas Research Network (2018). Comprehensive Characterization of Cancer Driver Genes and Mutations. *Cell* **173**, 371–385.e18.

Benjamin, L.R., Chung, H.J., Sanford, S., Kouzine, F., Liu, J., and Levens, D. (2008). Hierarchical mechanisms build the DNA-binding specificity of FUSE binding protein. *Proc. Natl. Acad. Sci. USA* **105**, 18296–18301.

Bettgowda, C., Agrawal, N., Jiao, Y., Sausen, M., Wood, L.D., Hruban, R.H., Rodriguez, F.J., Cahill, D.P., McLendon, R., Riggins, G., et al. (2011). Mutations in CIC and FUBP1 contribute to human oligodendroglioma. *Science* **333**, 1453–1455.

Braddock, D.T., Louis, J.M., Baber, J.L., Levens, D., and Clore, G.M. (2002). Structure and dynamics of KH domains from FBP bound to single-stranded DNA. *Nature* **415**, 1051–1056.

Brinkman, B.M.N. (2004). Splice variants as cancer biomarkers. *Clin. Biochem.* **37**, 584–594.

Campeau, E., Ruhl, V.E., Rodier, F., Smith, C.L., Rahmberg, B.L., Fuss, J.O., Campisi, J., Yaswen, P., Cooper, P.K., and Kaufman, P.D. (2009). A versatile viral system for expression and depletion of proteins in mammalian cells. *PLoS ONE* **4**, e6529.

Cerami, E., Gao, J., Dogrusoz, U., Gross, B.E., Sumer, S.O., Aksoy, B.A., Jacobsen, A., Byrne, C.J., Heuer, M.L., Larsson, E., et al. (2012). The cBio cancer genomics portal: an open platform for exploring multidimensional cancer genomics data. *Cancer Discov.* **2**, 401–404.

Cho, A., Shim, J.E., Kim, E., Supek, F., Lehner, B., and Lee, I. (2016). MUFFINN: cancer gene discovery via network analysis of somatic mutation data. *Genome Biol.* **17**, 129.

Climente-González, H., Porta-Pardo, E., Godzik, A., and Eyraes, E. (2017). The Functional Impact of Alternative Splicing in Cancer. *Cell Rep.* **20**, 2215–2226.

Dai, D., Wang, H., Zhu, L., Jin, H., and Wang, X. (2018). N6-methyladenosine links RNA metabolism to cancer progression. *Cell Death Dis.* **9**, 124.

Davoli, T., Xu, A.W., Mengwasser, K.E., Sack, L.M., Yoon, J.C., Park, P.J., and Elledge, S.J. (2013). Cumulative haploinsufficiency and triplosensitivity drive aneuploidy patterns and shape the cancer genome. *Cell* **155**, 948–962.

de la Rosa, J., Weber, J., Friedrich, M.J., Li, Y., Rad, L., Ponstingl, H., Liang, Q., de Quiros, S.B., Noorani, I., Metzakopian, E., et al. (2017). A single-copy Sleeping Beauty transposon mutagenesis screen identifies new PTEN-cooperating tumor suppressor genes. *Nat. Genet.* **49**, 730–741.

Deng, C.X., and Scott, F. (2000). Role of the tumor suppressor gene Brca1 in genetic stability and mammary gland tumor formation. *Oncogene* **19**, 1059–1064.

Dobin, A., Davis, C.A., Schlesinger, F., Drenkow, J., Zaleski, C., Jha, S., Batut, P., Chaisson, M., and Gingeras, T.R. (2013). STAR: ultrafast universal RNA-seq aligner. *Bioinformatics* **29**, 15–21.

Dominissini, D., Moshitch-Moshkovitz, S., Schwartz, S., Salmon-Divon, M., Ungar, L., Osenberg, S., Cesarkas, K., Jacob-Hirsch, J., Amariglio, N., Kupiec, M., et al. (2012). Topology of the human and mouse m6A RNA methylomes revealed by m6A-seq. *Nature* **485**, 201–206.

Dominissini, D., Moshitch-Moshkovitz, S., Salmon-Divon, M., Amariglio, N., and Rechavi, G. (2013a). Transcriptome-wide mapping of N(6)-methyladenosine by m(6)A-seq based on immunocapturing and massively parallel sequencing. *Nat. Protoc.* **8**, 176–189.

Duncan, R., Bazar, L., Michelotti, G., Tomonaga, T., Krutzsch, H., Avigan, M., and Levens, D. (1994). A sequence-specific, single-strand binding protein activates the far upstream element of c-myc and defines a new DNA-binding motif. *Genes Dev.* **8**, 465–480.

Fearon, E.R., and Vogelstein, B. (1990). A genetic model for colorectal tumorigenesis. *Cell* **61**, 759–767.

Fustin, J.M., Doi, M., Yamaguchi, Y., Hida, H., Nishimura, S., Yoshida, M., Isagawa, T., Morioka, M.S., Kakeya, H., Manabe, I., and Okamura, H. (2013). RNA-methylation-dependent RNA processing controls the speed of the circadian clock. *Cell* **155**, 793–806.

Gao, J., Aksoy, B.A., Dogrusoz, U., Dresdner, G., Gross, B., Sumer, S.O., Sun, Y., Jacobsen, A., Sinha, R., Larsson, E., et al. (2013). Integrative analysis of complex cancer genomics and clinical profiles using the cBioPortal. *Sci. Signal.* **6**, pl1.

- Garraway, L.A., and Lander, E.S. (2013). Lessons from the cancer genome. *Cell* 153, 17–37.
- Gentleman, R.C., Carey, V.J., Bates, D.M., Bolstad, B., Dettling, M., Dudoit, S., Ellis, B., Gautier, L., Ge, Y., Gentry, J., et al. (2004). Bioconductor: open software development for computational biology and bioinformatics. *Genome Biol.* 5, R80.
- Gohr, A., and Irimia, M. (2019). *Matt*: Unix tools for alternative splicing analysis. *Bioinformatics* 35, 130–132.
- Haigis, K.M., Cichowski, K., and Elledge, S.J. (2019). Tissue-specificity in cancer: The rule, not the exception. *Science* 363, 1150–1151.
- Hanahan, D., and Weinberg, R.A. (2000). The hallmarks of cancer. *Cell* 100, 57–70.
- Hastings, M.H. (2013). m(6)A mRNA methylation: a new circadian pacesetter. *Cell* 155, 740–741.
- He, L., Liu, J., Collins, I., Sanford, S., O'Connell, B., Benham, C.J., and Levens, D. (2000). Loss of FBP function arrests cellular proliferation and extinguishes c-myc expression. *EMBO J.* 19, 1034–1044.
- Hill, S.J., Clark, A.P., Silver, D.P., and Livingston, D.M. (2014). BRCA1 pathway function in basal-like breast cancer cells. *Mol. Cell. Biol.* 34, 3828–3842.
- Hsiao, H.H., Nath, A., Lin, C.Y., Folta-Stogniew, E.J., Rhoades, E., and Braddock, D.T. (2010). Quantitative characterization of the interactions among c-myc transcriptional regulators FUSE, FBP, and FIR. *Biochemistry* 49, 4620–4634.
- Huang, W., Sherman, B.T., and Lempicki, R.A. (2009a). Bioinformatics enrichment tools: paths toward the comprehensive functional analysis of large gene lists. *Nucleic Acids Res.* 37, 1–13.
- Huang, W., Sherman, B.T., and Lempicki, R.A. (2009b). Systematic and integrative analysis of large gene lists using DAVID bioinformatics resources. *Nat. Protoc.* 4, 44–57.
- Huber, L.J., Yang, T.W., Sarkisian, C.J., Master, S.R., Deng, C.X., and Chodosh, L.A. (2001). Impaired DNA damage response in cells expressing an exon 11-deleted murine Brca1 variant that localizes to nuclear foci. *Mol. Cell. Biol.* 21, 4005–4015.
- Huber, W., Carey, V.J., Gentleman, R., Anders, S., Carlson, M., Carvalho, B.S., Bravo, H.C., Davis, S., Gatto, L., Girke, T., et al. (2015). Orchestrating high-throughput genomic analysis with Bioconductor. *Nat. Methods* 12, 115–121.
- Hwang, I., Cao, D., Na, Y., Kim, D.Y., Zhang, T., Yao, J., Oh, H., Hu, J., Zheng, H., Yao, Y., and Paik, J. (2018). Far Upstream Element-Binding Protein 1 Regulates LSD1 Alternative Splicing to Promote Terminal Differentiation of Neural Progenitors. *Stem Cell Reports* 10, 1208–1221.
- Imielinski, M., Berger, A.H., Hammerman, P.S., Hernandez, B., Pugh, T.J., Ho-dis, E., Cho, J., Suh, J., Capelletti, M., Sivachenko, A., et al. (2012). Mapping the hallmarks of lung adenocarcinoma with massively parallel sequencing. *Cell* 150, 1107–1120.
- Irwin, N., Baekelandt, V., Goritchenko, L., and Benowitz, L.I. (1997). Identification of two proteins that bind to a pyrimidine-rich sequence in the 3'-untranslated region of GAP-43 mRNA. *Nucleic Acids Res.* 25, 1281–1288.
- Jacob, A.G., Singh, R.K., Mohammad, F., Bebee, T.W., and Chandler, D.S. (2014). The splicing factor FUBP1 is required for the efficient splicing of oncogene MDM2 pre-mRNA. *J. Biol. Chem.* 289, 17350–17364.
- Jaffrey, S.R., and Kharas, M.G. (2017). Emerging links between m<sup>6</sup>A and misregulated mRNA methylation in cancer. *Genome Med.* 9, 2.
- Lawrence, M.S., Stojanov, P., Mermel, C.H., Robinson, J.T., Garraway, L.A., Golub, T.R., Meyerson, M., Gabriel, S.B., Lander, E.S., and Getz, G. (2014). Discovery and saturation analysis of cancer genes across 21 tumour types. *Nature* 505, 495–501.
- Lee, S.H., Singh, I., Tisdale, S., Abdel-Wahab, O., Leslie, C.S., and Mayr, C. (2018). Widespread intronic polyadenylation inactivates tumour suppressor genes in leukaemia. *Nature* 561, 127–131.
- Leiserson, M.D.M., Vandin, F., Wu, H.T., Dobson, J.R., Eldridge, J.V., Thomas, J.L., Papoutsaki, A., Kim, Y., Niu, B., McLellan, M., et al. (2015). Pan-cancer network analysis identifies combinations of rare somatic mutations across pathways and protein complexes. *Nat. Genet.* 47, 106–114.
- Leng, N., Dawson, J.A., Thomson, J.A., Ruotti, V., Rissman, A.I., Smits, B.M.G., Haag, J.D., Gould, M.N., Stewart, R.M., and Kendziorski, C. (2013). EBSseq: an empirical Bayes hierarchical model for inference in RNA-seq experiments. *Bioinformatics* 29, 1035–1043.
- Leng, N., and Kendziorski, C. (2019). EBSseq: An R package for gene and isoform differential expression analysis of RNA-seq data. R package version 1.24.0. <http://bioconductor.org/packages/release/bioc/html/EBSseq.html>.
- Li, B., and Dewey, C.N. (2011). RSEM: accurate transcript quantification from RNA-Seq data with or without a reference genome. *BMC Bioinformatics* 12, 323.
- Li, H., Handsaker, B., Wysoker, A., Fennell, T., Ruan, J., Homer, N., Marth, G., Abecasis, G., and Durbin, R.; 1000 Genome Project Data Processing Subgroup (2009). The Sequence Alignment/Map format and SAMtools. *Bioinformatics* 25, 2078–2079.
- Li, H., Wang, Z., Zhou, X., Cheng, Y., Xie, Z., Manley, J.L., and Feng, Y. (2013). Far upstream element-binding protein 1 and RNA secondary structure both mediate second-step splicing repression. *Proc. Natl. Acad. Sci. USA* 110, E2687–E2695.
- Liao, S., Davoli, T., Leng, Y., Li, M.Z., Xu, Q., and Elledge, S.J. (2017). A genetic interaction analysis identifies cancer drivers that modify EGFR dependency. *Genes Dev* 31, 184–196.
- Liao, S., Maertens, O., Cichowski, K., and Elledge, S.J. (2018). Genetic modifiers of the BRD4-NUT dependency of NUT midline carcinoma uncovers a synergism between BETis and CDK4/6is. *Genes Dev* 32, 1188–1200.
- Lin, J.Y., Li, M.L., and Shih, S.R. (2009). Far upstream element binding protein 2 interacts with enterovirus 71 internal ribosomal entry site and negatively regulates viral translation. *Nucleic Acids Res* 37, 47–59.
- Liu, J., Kouzine, F., Nie, Z., Chung, H.J., Elisha-Feil, Z., Weber, A., Zhao, K., and Levens, D. (2006). The FUSE/FBP/FIR/TFIIH system is a molecular machine programming a pulse of c-myc expression. *EMBO J* 25, 2119–2130.
- Malz, M., Weber, A., Singer, S., Riehrer, V., Bissinger, M., Riener, M.O., Longgerich, T., Soll, C., Vogel, A., Angel, P., et al. (2009). Overexpression of far upstream element binding proteins: a mechanism regulating proliferation and migration in liver cancer cells. *Hepatology* 50, 1130–1139.
- Marusyk, A., Almendro, V., and Polyak, K. (2012). Intra-tumour heterogeneity: a looking glass for cancer? *Nat. Rev. Cancer* 12, 323–334.
- Merid, S.K., Goranskaya, D., and Alexeyenko, A. (2014). Distinguishing between driver and passenger mutations in individual cancer genomes by network enrichment analysis. *BMC Bioinformatics* 15, 308.
- Meyer, K.D., and Jaffrey, S.R. (2014). The dynamic epitranscriptome: N6-methyladenosine and gene expression control. *Nat. Rev. Mol. Cell Biol.* 15, 313–326.
- Meyer, K.D., and Jaffrey, S.R. (2017). Rethinking m<sup>6</sup>A readers, writers, and erasers. *Annu. Rev. Cell Dev. Biol.* 33, 319–342.
- Meyer, K.D., Saletore, Y., Zumbo, P., Elemento, O., Mason, C.E., and Jaffrey, S.R. (2012). Comprehensive analysis of mRNA methylation reveals enrichment in 3' UTRs and near stop codons. *Cell* 149, 1635–1646.
- Meyer, K.D., Patil, D.P., Zhou, J., Zinoviev, A., Skabkin, M.A., Elemento, O., Pestova, T.V., Qian, S.B., and Jaffrey, S.R. (2015). 5' UTR m(6)A Promotes Cap-Independent Translation. *Cell* 163, 999–1010.
- Miki, Y., Swensen, J., Shattuck-Eidens, D., Futreal, P.A., Harshman, K., Tavtigian, S., Liu, Q., Cochran, C., Bennett, L.M., Ding, W., et al. (1994). A strong candidate for the breast and ovarian cancer susceptibility gene BRCA1. *Science* 266, 66–71.
- Miller, D.H., Sokol, E.S., and Gupta, P.B. (2017). 3D Primary Culture Model to Study Human Mammary Development. *Methods Mol. Biol.* 1612, 139–147.
- Miro, J., Laaref, A.M., Rofidal, V., Lagrèfeuille, R., Hem, S., Thorel, D., Méchin, D., Mamchaoui, K., Mouly, V., Claustres, M., and Tuffery-Giraud, S. (2015). FUBP1: a new protagonist in splicing regulation of the DMD gene. *Nucleic Acids Res.* 43, 2378–2389.

- Mistry, S., Rafii, S., Shippen, A., MacPherson, G., Balasubramanian, S., Reed, M., and Cox, A. (2006). Role of CASP8 D302H and other apoptosis gene variants in breast cancer. *Breast Cancer Res.* **8**, 11.
- Nacson, J., Kraiss, J.J., Bernhardt, A.J., Clausen, E., Feng, W., Wang, Y., Nicolas, E., Cai, K.Q., Tricarico, R., Hua, X., et al. (2018). BRCA1 mutation-specific responses to 53bp1 loss-induced homologous recombination and PARP inhibitor resistance. *Cell Rep.* **24**, 3513–3527.e7.
- Ni, T.K., and Kuperwasser, C. (2016). Premature polyadenylation of MAGI3 produces a dominantly-acting oncogene in human breast cancer. *eLife* **5**, e14730.
- Ni, T.K., Landrette, S.F., Bjornson, R.D., Bosenberg, M.W., and Xu, T. (2013). Low-copy piggyBac transposon mutagenesis in mice identifies genes driving melanoma. *Proc. Natl. Acad. Sci. USA* **110**, E3640–E3649.
- Ni, T.K., Elman, J.S., Jin, D.X., Gupta, P.B., and Kuperwasser, C. (2018). Premature polyadenylation of MAGI3 is associated with diminished N<sup>6</sup>-methyladenosine in its large internal exon. *Sci. Rep.* **8**, 1415.
- Pan, Y., Ma, P., Liu, Y., Li, W., and Shu, Y. (2018). Multiple functions of m<sup>6</sup>A RNA methylation in cancer. *J. Hematol. Oncol.* **11**, 48.
- Park, J.W., Tokheim, C., Shen, S., and Xing, Y. (2013). Identifying Differential Alternative Splicing Events from RNA Sequencing Data Using RNASeq-MATS. In *Deep Sequencing Data Analysis*, N. Shomron, ed. (Humana Press), pp. 171–179.
- Patil, D.P., Chen, C.K., Pickering, B.F., Chow, A., Jackson, C., Guttman, M., and Jaffrey, S.R. (2016). m(6)A RNA methylation promotes XIST-mediated transcriptional repression. *Nature* **537**, 369–373.
- Pereira, B., Chin, S.F., Rueda, O.M., Vollen, H.K.M., Provenzano, E., Bardwell, H.A., Pugh, M., Jones, L., Russell, R., Sammut, S.J., et al. (2016). Erratum: The somatic mutation profiles of 2,433 breast cancers refine their genomic and transcriptomic landscapes. *Nat. Commun.* **7**, 11908.
- Perlman, R.L. (2016). Mouse models of human disease: An evolutionary perspective. *Evol. Med. Public Health* **2016**, 170–176.
- Pu, X., Storr, S.J., Zhang, Y., Rakha, E.A., Green, A.R., Ellis, I.O., and Martin, S.G. (2017). Caspase-3 and caspase-8 expression in breast cancer: caspase-3 is associated with survival. *Apoptosis* **22**, 357–368.
- Qu, Y., Han, B., Yu, Y., Yao, W., Bose, S., Karlan, B.Y., Giuliano, A.E., and Cui, X. (2015). Evaluation of MCF10A as a Reliable Model for Normal Human Mammary Epithelial Cells. *PLoS ONE* **10**, e0131285.
- Rabenhorst, U., Beinoraviciute-Kellner, R., Brezniceanu, M.L., Joos, S., Devens, F., Lichter, P., Rieker, R.J., Trojan, J., Chung, H.J., Levens, D.L., and Zörnig, M. (2009). Overexpression of the far upstream element binding protein 1 in hepatocellular carcinoma is required for tumor growth. *Hepatology* **50**, 1121–1129.
- Raponi, M., Smith, L.D., Silipo, M., Stuanji, C., Buratti, E., and Baralle, D. (2014). BRCA1 exon 11 a model of long exon splicing regulation. *RNA Biol.* **11**, 351–359.
- Sack, L.M., Davoli, T., Li, M.Z., Li, Y., Xu, Q., Naxerova, K., Wooten, E.C., Bernardi, R.J., Martin, T.D., Chen, T., et al. (2018). Profound tissue specificity in proliferation control underlies cancer drivers and aneuploidy patterns. *Cell* **173**, 499–514.e23.
- Sahm, F., Koelsche, C., Meyer, J., Pusch, S., Lindenberg, K., Mueller, W., Herold-Mende, C., von Deimling, A., and Hartmann, C. (2012). CIC and FUBP1 mutations in oligodendrogliomas, oligoastrocytomas and astrocytomas. *Acta Neuropathol.* **123**, 853–860.
- Schneider, G., Schmidt-Supprian, M., Rad, R., and Saur, D. (2017). Tissue-specific tumorigenesis: context matters. *Nat. Rev. Cancer* **17**, 239–253.
- Shen, S., Park, J.W., Huang, J., Dittmar, K.A., Lu, Z., Zhou, Q., Carstens, R.P., and Xing, Y. (2012). MATS: a Bayesian framework for flexible detection of differential alternative splicing from RNA-Seq data. *Nucleic Acids Res.* **40**, e61–e61.
- Seiler, M., Peng, S., Agrawal, A.A., Palacino, J., Teng, T., Zhu, P., Smith, P.G., Buonamici, S., Yu, L., Caesar-Johnson, S.J., et al.; Cancer Genome Atlas Research Network (2018). Somatic mutational landscape of splicing factor genes and their functional consequences across 33 cancer types. *Cell Rep.* **23**, 282–296.e4.
- Shen, S., Park, J.W., Lu, Z.X., Lin, L., Henry, M.D., Wu, Y.N., Zhou, Q., and Xing, Y. (2014). rMATS: robust and flexible detection of differential alternative splicing from replicate RNA-Seq data. *Proc. Natl. Acad. Sci. USA* **111**, E5593–E5601.
- Singer, S., Malz, M., Herpel, E., Warth, A., Bissinger, M., Keith, M., Muley, T., Meister, M., Hoffmann, H., Penzel, R., et al. (2009). Coordinated expression of stathmin family members by far upstream sequence element-binding protein-1 increases motility in non-small cell lung cancer. *Cancer Res.* **69**, 2234–2243.
- Sokol, E.S., Miller, D.H., Breggia, A., Spencer, K.C., Arendt, L.M., and Gupta, P.B. (2016). Growth of human breast tissues from patient cells in 3D hydrogel scaffolds. *Breast Cancer Res.* **18**, 19.
- Stupack, D.G. (2013). Caspase-8 as a therapeutic target in cancer. *Cancer Lett.* **332**, 133–140.
- Subramanian, A., Tamayo, P., Mootha, V.K., Mukherjee, S., Ebert, B.L., Gillette, M.A., Paulovich, A., Pomeroy, S.L., Golub, T.R., Lander, E.S., and Mesirov, J.P. (2005). Gene set enrichment analysis: a knowledge-based approach for interpreting genome-wide expression profiles. *Proc. Natl. Acad. Sci. USA* **102**, 15545–15550.
- Takeda, H., Rust, A.G., Ward, J.M., Yew, C.C.K., Jenkins, N.A., and Copeland, N.G. (2016). *Sleeping Beauty* transposon mutagenesis identifies genes that cooperate with mutant *Smad4* in gastric cancer development. *Proc. Natl. Acad. Sci. USA* **113**, E2057–E2065.
- Tammara, C., Raponi, M., Wilson, D.I., and Baralle, D. (2012). BRCA1 exon 11 alternative splicing, multiple functions and the association with cancer. *Biochem. Soc. Trans.* **40**, 768–772.
- Tokheim, C.J., Papadopoulos, N., Kinzler, K.W., Vogelstein, B., and Karchin, R. (2016). Evaluating the evaluation of cancer driver genes. *Proc. Natl. Acad. Sci. USA* **113**, 14330–14335.
- Venables, J.P. (2006). Unbalanced alternative splicing and its significance in cancer. *BioEssays* **28**, 378–386.
- Wang, X., Zhao, B.S., Roundtree, I.A., Lu, Z., Han, D., Ma, H., Weng, X., Chen, K., Shi, H., and He, C. (2015). N(6)-methyladenosine Modulates Messenger RNA Translation Efficiency. *Cell* **161**, 1388–1399.
- Wang, Y., Bernhardt, A.J., Cruz, C., Kraiss, J.J., Nacson, J., Nicolas, E., Peri, S., van der Gulden, H., van der Heijden, I., O'Brien, S.W., et al. (2016). The BRCA1-Δ11q Alternative Splice Isoform Bypasses Germline Mutations and Promotes Therapeutic Resistance to PARP Inhibition and Cisplatin. *Cancer Res.* **76**, 2778–2790.
- Westermarck, U.K., Reyngold, M., Olshen, A.B., Baer, R., Jasin, M., and Moy-nahan, M.E. (2003). BARD1 participates with BRCA1 in homology-directed repair of chromosome breaks. *Mol. Cell. Biol.* **23**, 7926–7936.
- Wilson, C.A., Payton, M.N., Elliott, G.S., Buaas, F.W., Cajulis, E.E., Grosshans, D., Ramos, L., Reese, D.M., Slamon, D.J., and Calzone, F.J. (1997). Differential subcellular localization, expression and biological toxicity of BRCA1 and the splice variant BRCA1-delta11b. *Oncogene* **14**, 1–16.
- Wood, L.D., Parsons, D.W., Jones, S., Lin, J., Sjöblom, T., Leary, R.J., Shen, D., Boca, S.M., Barber, T., Ptak, J., et al. (2007). The genomic landscapes of human breast and colorectal cancers. *Science* **318**, 1108–1113.
- Xiao, W., Adhikari, S., Dahal, U., Chen, Y.S., Hao, Y.J., Sun, B.F., Sun, H.Y., Li, A., Ping, X.L., Lai, W.Y., et al. (2016). Nuclear m(6)A reader YTHDC1 regulates mRNA splicing. *Mol. Cell* **61**, 507–519.
- Xu, X., Weaver, Z., Linke, S.P., Li, C., Gotay, J., Wang, X.W., Harris, C.C., Ried, T., and Deng, C.X. (1999). Centrosome amplification and a defective G2-M cell cycle checkpoint induce genetic instability in BRCA1 exon 11 isoform-deficient cells. *Mol. Cell* **3**, 389–395.
- Yin, M., Yan, J., Wei, S., and Wei, Q. (2010). CASP8 polymorphisms contribute to cancer susceptibility: evidence from a meta-analysis of 23 publications with 55 individual studies. *Carcinogenesis* **31**, 850–857.

- Yu, G., Wang, L.G., Han, Y., and He, Q.Y. (2012). clusterProfiler: an R package for comparing biological themes among gene clusters. *OMICS* 16, 284–287.
- Yu, G., Wang, L.G., and Dall'Olio, G. (2017). Statistical analysis and visualization of functional profiles for genes and gene clusters. *Bioconductor*. <https://bioconductor.statistik.tu-dortmund.de/packages/3.6/bioc/vignettes/clusterProfiler/inst/doc/clusterProfiler.html>.
- Yue, Y., Liu, J., Cui, X., Cao, J., Luo, G., Zhang, Z., Cheng, T., Gao, M., Shu, X., Ma, H., et al. (2018). VIRMA mediates preferential m<sup>6</sup>A mRNA methylation in 3'UTR and near stop codon and associates with alternative polyadenylation. *Cell Discov.* 4, 10.
- Zhang, J., and Chen, Q.M. (2013). Far upstream element binding protein 1: a commander of transcription, translation and beyond. *Oncogene* 32, 2907–2916.
- Zhang, F., Tian, Q., and Wang, Y. (2013). Far upstream element-binding protein 1 (FUBP1) is overexpressed in human gastric cancer tissue compared to non-cancerous tissue. *Onkologie* 36, 650–655.
- Zhou, W., Chung, Y.J., Parrilla Castellar, E.R., Zheng, Y., Chung, H.J., Bandle, R., Liu, J., Tessarollo, L., Batchelor, E., Apian, P.D., and Levens, D. (2016). Far upstream element binding protein plays a crucial role in embryonic development, hematopoiesis, and stabilizing Myc expression levels. *Am. J. Pathol.* 186, 701–715.



## STAR★METHODS

### KEY RESOURCES TABLE

| REAGENT or RESOURCE                                                         | SOURCE                                   | IDENTIFIER                        |
|-----------------------------------------------------------------------------|------------------------------------------|-----------------------------------|
| <b>Antibodies</b>                                                           |                                          |                                   |
| Mouse monoclonal: $\beta$ -actin                                            | Abcam                                    | Cat# ab6276; RRID: AB_2223210     |
| Rabbit polyclonal: m <sup>6</sup> A                                         | Synaptic Systems                         | Cat# 202-003; RRID: AB_2279214    |
| Rabbit monoclonal: FUBP1                                                    | Abcam                                    | Cat# ab181111; EPR12327           |
| Rabbit monoclonal: PTEN                                                     | Cell Signaling                           | Cat# 9559; RRID: AB_390810        |
| Mouse monoclonal: V5                                                        | ThermoFisher                             | Cat# R960-25; RRID: AB_2556564    |
| Rabbit polyclonal: MATR3                                                    | Bethyl Labs                              | Cat# A300-591A; RRID: AB_495514   |
| Rabbit polyclonal: RBM15                                                    | Abcam                                    | Cat# ab96544; RRID: AB_10680900   |
| Rabbit monoclonal: HuR                                                      | Cell Signaling                           | Cat# 12582S; D9W7E                |
| Rabbit polyclonal: hnRNP A2B1                                               | ThermoFisher                             | Cat# PA5-30061; RRID: AB_2547535  |
| Rabbit polyclonal: METTL3                                                   | Fisher                                   | Cat# 15073-1AP; RRID: AB_2142033  |
| Rabbit polyclonal: YTHDF2                                                   | Abcam                                    | Cat# ab99080; RRID: AB_10675362   |
| Rabbit polyclonal: CK14                                                     | Vector Labs                              | Cat# 9020-P; RRID: AB_149727      |
| Mouse monoclonal: CK8/18                                                    | ThermoFisher                             | Cat# MA5 12281; RRID: AB_10986863 |
| Rabbit polyclonal: VIRMA                                                    | Bethyl Labs                              | Cat# A302-123A; RRID: AB_1720420  |
| Rabbit polyclonal: CASP8                                                    | Genetex                                  | Cat# GTX110723; RRID: AB_2036448  |
| Rabbit polyclonal: BRCA1                                                    | Santa Cruz                               | Cat# sc-642; RRID: AB_630944      |
| Rabbit polyclonal: MAGI3                                                    | Novus Biologicals                        | Cat# NBP2-17210                   |
| Mouse: AF555-                                                               | ThermoFisher                             | Cat# A21424; RRID: AB_141780      |
| Rabbit: AF488-                                                              | ThermoFisher                             | Cat# R37116; RRID: AB_2556544     |
| Mouse: HRP-                                                                 | Cell Signaling                           | Cat# 7076; RRID: AB_330924        |
| Rabbit: HRP-                                                                | Cell Signaling                           | Cat# 7074; RRID: AB_2099233       |
| Mouse monoclonal: MDM2                                                      | Santa cruz                               | Cat# sc-965; RRID: AB_627920      |
| Rabbit monoclonal: CASP8                                                    | Abcam                                    | Cat#ab32125; RRID: AB_2068469     |
| Rabbit monoclonal: FUBP1                                                    | Abcam                                    | Cat#ab213525; EPR19208            |
| <b>Bacterial and Virus Strains</b>                                          |                                          |                                   |
| pLentiCRISPRv2-blast                                                        | Addgene                                  | RRID: Addgene_83480               |
| pLentiCRISPRv2-puro                                                         | Addgene                                  | RRID: Addgene_52961               |
| pLenti6.2/V5-DEST-FUBP1                                                     | DNASU Repository                         | HsCD00329438                      |
| pLenti6.2/V5-DEST Empty Vector                                              | ThermoFisher                             | V36820                            |
| pLenti-PGK V5-LUC Neo                                                       | Addgene                                  | RRID: Addgene_21471               |
| pHAGE-pInducer10-miRE-pheS( $\Delta$ EcoRI)                                 | Elledge Lab                              | RRID: Addgene_44011               |
| One shot Stbl3 competent <i>E. coli</i>                                     | ThermoFisher                             | C737303                           |
| <b>Critical Commercial Assays</b>                                           |                                          |                                   |
| CellTiter 96® Aqueous One Solution Cell Proliferation Assay (MTS)           | Promega                                  | G3582                             |
| TruSeq mRNA Stranded Library Prep                                           | Illumina                                 | 20020594                          |
| NEBNext Magnesium RNA Fragmentation Module                                  | NEB                                      | E6150S                            |
| DynaBeads mRNA Purification Kit                                             | ThermoFisher                             | 61006                             |
| DynaBeads MyOne Silane                                                      | ThermoFisher                             | 37002D                            |
| ProtoScript II First Strand cDNA Synthesis Kit                              | NEB                                      | E6360S                            |
| <b>Deposited Data</b>                                                       |                                          |                                   |
| Raw and analyzed RNaseq data                                                | This paper                               | GEO: GSE122416                    |
| FUBP1-V5 and Empty Vector-V5 Immunoprecipitation/<br>Mass spectrometry data | This paper                               | <a href="#">Table S3</a>          |
| m <sup>6</sup> A Seq data                                                   | <a href="#">Dominissini et al., 2012</a> | GEO: GSE37005                     |

(Continued on next page)

| <b>Continued</b>                                                                    |                                                                               |                                                                                                                                                               |
|-------------------------------------------------------------------------------------|-------------------------------------------------------------------------------|---------------------------------------------------------------------------------------------------------------------------------------------------------------|
| REAGENT or RESOURCE                                                                 | SOURCE                                                                        | IDENTIFIER                                                                                                                                                    |
| Experimental Models: Cell Lines                                                     |                                                                               |                                                                                                                                                               |
| Human: MCF10F cells                                                                 | ATCC                                                                          | Cat# CRL-10318; RRID: CVCL_3633                                                                                                                               |
| Human: MCF10A cells                                                                 | ATCC                                                                          | Cat#CRL-10317; RRID: CVCL_0598                                                                                                                                |
| Mouse: HEK293T cells                                                                | ATCC                                                                          | Cat# CRL-3216; RRID: CVCL_0063                                                                                                                                |
| Experimental Models: Organisms/Strains                                              |                                                                               |                                                                                                                                                               |
| Mouse: NOD.CB17-Prkdc <sup>scid</sup> /J                                            | The Jackson Laboratory                                                        | Cat# 001303; RRID: IMSR_JAX:001303                                                                                                                            |
| Oligonucleotides                                                                    |                                                                               |                                                                                                                                                               |
| Primers for m6A RIP-qPCR: See <a href="#">Table S4</a>                              | This paper                                                                    | <a href="#">Table S4</a>                                                                                                                                      |
| sgRNA for FUBP1.3: GTTTGCTGCTGATGCATCGG                                             | This paper                                                                    | N/A                                                                                                                                                           |
| sgRNA for FUBP1.10: GCAGCCCCATATGCTCCCCA                                            | This paper                                                                    | N/A                                                                                                                                                           |
| sgRNA for PTEN: GCATCTGGATTATAGACCAG                                                | This paper                                                                    | N/A                                                                                                                                                           |
| Methylated RNA bait: biotin-AUGGGCCGUUCAUCUGCU AAAAGG-m6A- CUGCUUUUGGGGCUUGU        | <a href="#">Dominissini et al., 2012</a>                                      | N/A                                                                                                                                                           |
| Non-methylated RNA bait for RIP: biotin-AUGGGCCGUU CAUCUGCUAAAAGGACUGCUUUUGGGGCUUGU | <a href="#">Dominissini et al., 2012</a>                                      | N/A                                                                                                                                                           |
| Recombinant DNA                                                                     |                                                                               |                                                                                                                                                               |
| Plasmid: pLentiCRISPRv2-blast-FUBP1.3                                               | This paper                                                                    | N/A                                                                                                                                                           |
| Plasmid: pLentiCRISPRv2-blast-FUBP1.10                                              | This paper                                                                    | N/A                                                                                                                                                           |
| Plasmid: pLentiCRISPRv2-puro-PTEN                                                   | This paper                                                                    | N/A                                                                                                                                                           |
| Plasmid: pLenti6.2/V5-DEST-FUBP1                                                    | DNASU Repository                                                              | HsCD00329438                                                                                                                                                  |
| Plasmid: pLenti-PGK V5-LUC Neo                                                      | <a href="#">Campeau et al., 2009</a>                                          | Addgene Plasmid #21471                                                                                                                                        |
| Software and Algorithms                                                             |                                                                               |                                                                                                                                                               |
| RSEM                                                                                | <a href="#">Li and Dewey, 2011</a>                                            | <a href="https://github.com/deweylab/RSEM">https://github.com/deweylab/RSEM</a>                                                                               |
| Samtools                                                                            | <a href="#">Li et al., 2009</a>                                               | <a href="http://samtools.sourceforge.net/">http://samtools.sourceforge.net/</a>                                                                               |
| EBSeq                                                                               | <a href="#">Leng and Kendziorski, 2019</a>                                    | <a href="http://bioconductor.org/packages/release/bioc/html/EBSeq.html">http://bioconductor.org/packages/release/bioc/html/EBSeq.html</a>                     |
| rMATS.4.0.1                                                                         | <a href="#">Shen et al., 2012, 2014;</a><br><a href="#">Park et al., 2013</a> | <a href="http://rmseq-mats.sourceforge.net/">http://rmseq-mats.sourceforge.net/</a>                                                                           |
| Rmats2sashimiplot                                                                   | <a href="#">Gohr and Irimia, 2019</a>                                         | <a href="https://github.com/Xinglab/rmats2sashimiplot">https://github.com/Xinglab/rmats2sashimiplot</a>                                                       |
| STAR                                                                                | <a href="#">Dobin et al., 2013</a>                                            | <a href="https://github.com/alexdobin/STAR">https://github.com/alexdobin/STAR</a>                                                                             |
| ClusterProfiler                                                                     | <a href="#">Yu et al., 2012</a>                                               | <a href="http://bioconductor.org/packages/release/bioc/html/clusterProfiler.html">http://bioconductor.org/packages/release/bioc/html/clusterProfiler.html</a> |
| Gene Set Enrichment Analysis (GSEA)                                                 | <a href="#">Subramanian et al., 2005</a>                                      | <a href="http://software.broadinstitute.org/gsea/index.jsp">http://software.broadinstitute.org/gsea/index.jsp</a>                                             |
| Database for Annotation, Visualization, and Integrated Discovery (DAVID)            | <a href="#">Huang et al., 2009a;</a> <a href="#">Huang et al., 2009b</a>      | <a href="https://david.ncifcrf.gov">https://david.ncifcrf.gov</a>                                                                                             |

## LEAD CONTACT AND MATERIALS AVAILABILITY

Further information and requests for resources and reagents should be directed to and will be fulfilled by the Lead Contact, Charlotte Kuperwasser ([charlotte.kuperwasser@tufts.edu](mailto:charlotte.kuperwasser@tufts.edu)). Plasmids and cell lines generated in this study are available upon request via a material transfer agreement (MTA).

## EXPERIMENTAL MODELS AND SUBJECT DETAILS

### Cell Lines and Tissue Culture

The cell lines used in this study (MCF10F, MCF10A and HEK293T) were purchased from ATCC, are originally derived from female tissue (Manassas, VA), and have been authenticated by shorten tandem repeat DNA profiling and validation that they are free of mycoplasma contamination. Cells were grown at 37°C with 5% CO<sub>2</sub> and cultured in DMEM/F12 supplemented with 5% horse serum, 100 ng/ml cholera toxin, 5 μg/ml insulin, 0.5 μg/ml hydrocortisone, 50 ng/ml EGF, and 1% antibiotic/antimycotic (Corning, Corning, NY). Transfections were performed using FuGENE HD (Promega, Madison, WI). For lentivirus production, HEK293T cells were co-transfected with pCMV-VSV-G, pCMV-Δ8.2-Δvpr, and lentiviral expression vectors. For the generation of cell lines, MCF10F,

MCF10A and HEK293T cells were incubated overnight in viral supernatants supplemented with 8  $\mu$ L/ml protamine sulfate and subsequently selected for with antibiotics. Cell lines harboring multiple genetic manipulations were created by serial transductions. Clonal cell populations were created from single cells sorted into 96-well plates.

### Mice and Orthotopic Tumor Growth Studies

A colony of immunocompromised NOD-SCID mice (RRID: IMSUR\_JAX:001303) was maintained in-house under aseptic sterile conditions. Mice were administered autoclaved food and water *ad libitum*. Surgeries were performed under sterile conditions, and animals received analgesic subcutaneously before surgical procedures and antibiotics in the drinking water up to 2 weeks after all surgical procedures. Before surgery, 6-week old female NOD-SCID mice were anesthetized by isoflurane vapor. An incision was made along the right and left flanks to expose the inguinal mammary glands, and cells were injected in a total volume of 30  $\mu$ L 1:1 Matrigel:phosphate-buffered saline were injected into the gland. Post-operative analgesic, antibiotic and monitoring were provided. Animals were sacrificed when tumors reached burden limit ( $\sim$ 2 cm), and tumors were dissected and measured. In experiments in which injected cells expressed luciferin, cell dissemination was monitored weekly using an IVIS Spectrum (PerkinElmer, Waltham, MA). Image acquisition was performed 5 minutes after intraperitoneal injection of 75 mg/kg D-Luciferin (Gold Biotechnology, St. Louis, MO) with mice dorsal side up. The signals were quantified using the LivingImage software (PerkinElmer) by drawing a region of interest around each mammary gland to determine the radiance (in photons) emitted for a given time.

## METHOD DETAILS

### CRISPR-Cas9 Tumor Suppressor Library Screen

DNA oligonucleotides encoding sgRNA sequences designed to target the top 100 TUSON-predicted TSGs were synthesized on a custom microarray (Agilent). These oligonucleotides were PCR-amplified separately with specific sets of primers. PCR-amplified gRNA libraries were digested with BbsI and purified on a 10% TBE PAGE gel. Purified, digested fragments were cloned into BsmBI-digested pLentiCRISPRv2 (Addgene Plasmid #52961). A negative control non-cutting gRNA library comprised of 500 gRNAs targeting the *E. coli* genome was designed and cloned in parallel. Gel purified digestion products were cloned into a XhoI/EcoRI digested pHAGE-pInducer10-miRE-pheS( $\Delta$ EcoRI) plasmid. To create the pHAGE-pInducer10miRE-pheS( $\Delta$ EcoRI) vector, the pInducer10 mir30 shRNA construct was moved to the pHAGE backbone, with pertinent mir30 elements being replaced by miR-E elements by PCR. In addition, the sole EcoRI restriction site in the pHAGE backbone was mutated to facilitate cloning. To produce lentivirus, HEK293T cells were seeded in tissue culture dishes at  $6 \times 10^5$  cells per 0.9  $\text{cm}^2$  of tissue culture surface area. Plasmid DNA was diluted into serum-free medium with a lentiviral packaging plasmid mixture of SV40 VSVg, Gag/Pol, Tat, and Rev, and transfected with PolyJet (SigmaGen). Cell culture media was changed 24 hours later. After 48 hours, the supernatant was harvested, filtered through a low-protein-binding HT Tuffryn® membrane with 0.45  $\mu$ m pores (Pall, cat #4184), aliquoted, and stored at  $-80^\circ\text{C}$ . Lentiviral titer was determined by transducing U2-OS cells plated at clonogenic density with serial dilutions of virus in the presence of 4  $\mu$ g/mL polybrene. After selecting with puromycin, colonies were stained with methylene blue and counted manually to determine viral titer.

MCF10F cells were incubated overnight with the lentiviral libraries, at a multiplicity of infection (MOI) of 3 viral particles per cell. After 24 hours, the media was replaced with regular growth media, and the following day the library-infected cells were selected with puromycin. Surviving cells were expanded over 7 days. A fraction of cells, a “pre-screen pellet” for analyses of library representation in the cells pre-injection, was set aside and frozen, and the remaining cells were used for orthotopic xenografts, in which  $1 \times 10^6$  cells were injected per gland. Tumors grew over a span of 10 weeks, at the end of which animals were sacrificed. Tumors larger than 5  $\text{cm}^3$  were randomly sampled for histology, and the remainder of the tumor was digested and processed for sequencing. If the tumor was smaller than 5  $\text{cm}^3$ , it was entirely used for sequencing. Tumors were manually diced with a razor blade: for histology, sections were fixed in 10% neutral buffered formalin for 24 hours before storage in 70% ethanol prior to paraffin embedding and sectioning. Remaining parts of tumors were digested overnight at  $55^\circ\text{C}$  in 10mM Tris pH 8.0, 10mM EDTA, 0.5% SDS, and 0.5mg/mL Proteinase K. Subsequently, genomic DNA was isolated by two rounds of phenol: chloroform extraction using Phaselock tubes (5 PRIME), followed by two rounds of chloroform extraction. RNase A was added at a final concentration of 25  $\mu$ g/mL and incubated for at least 4 hours at  $37^\circ\text{C}$  before two additional rounds of phenol: chloroform and one additional round of chloroform extraction. DNA was ethanol-precipitated, recovered by centrifugation, washed three times with 70% ethanol, and resuspended in 10mM Tris-Cl pH 8.5. sgRNA sequences were PCR-amplified and adapted for Illumina sequencing. This adaptation involved the addition of a P5 adaptor and a stagger sequence of variable length 5' to the variable sgRNA, followed by a 3' Illumina index sequence primer binding site, a 7 base pair index sequence, and a P7 adaptor. The relative representation of library sgRNA in each sample was determined by Illumina sequencing on a HiSeq2000 system.

To identify the cooperating TSGs promoting tumor growth, we recovered the barcoded sgRNAs from genomic DNA via PCR, followed by high-throughput sequencing of the PCR amplicons. An enrichment score for each gRNA was calculated by dividing the number of reads for each TSG in the screened cells by that of the pre-screen cells (transduced but not injected cells) and of cells that were transduced with non-targeting sgRNAs (control). The sgRNAs in cooperative subclones were grouped together based on read count similarity. The differences in read counts were calculated, and a cluster of two or more sgRNAs with very small differences followed by a steep drop off indicated a higher likelihood that the sgRNAs appeared in the same tumor subclone.

### Cellular proliferation and soft agar assays

To measure cellular proliferation, 200 cells were plated per well in a 96-well plate, and after 2 days, cell viability was measured using CellTiter 96® Aqueous One Solution Cell Proliferation Assay (Promega, Madison, WI) every day for the following week. Colorimetric readout was measured on a SpectraMax (San Jose, CA) plate reader. For soft agar assay to detect anchorage independent growth,  $1 \times 10^4$  cells were suspended in a 0.4% Seaplaque (Lonza, Basel, Switzerland) agarose: culture media mixture and layered onto a 0.8% agarose in DMEM. Fresh growth medium was applied every 7 days and colonies were allowed to grow for 2 weeks. Colonies were stained with 0.005% crystal violet and imaged for quantification (colonies  $\geq 50 \mu\text{m}$ ) with Fiji ImageJ software.

### 3D Hydrogel Seeding and Analyses

Protocol for seeding of hydrogels (750 cells per gel) and immunofluorescence staining was followed as previously described (Miller et al., 2017; Sokol et al., 2016). Fixed, permeabilized, and stained gels were mounted on glass slides and coverslipped, and images were acquired on a Zeiss 510 confocal microscope. Confocal images were first processed to adjust color palette, balance, and contrast using the Fiji ImageJ software applied to the entire image before figure assembly in Adobe Illustrator.

### Protein isolation for immunoblotting, immunoprecipitation, and mass spectrometry

To isolate protein from whole-cell lysates for immunoblotting, cells were scraped and lysed in RIPA buffer (Cell Signaling Technology, Danvers, MA) supplemented with protease inhibitors (Roche, Boston, MA) and phosphatase inhibitors (Sigma-Aldrich, St. Louis, MO). Protein samples were separated by SDS-PAGE according to standard procedures, transferred onto nitrocellulose membranes and blocked with 5% milk in Tris-buffered saline, 0.05% Tween-20. Immunoblotting was performed according to standard procedures and protein detection was visualized using enhanced chemiluminescence (Thermo Fisher Scientific). For immunoprecipitation for detecting FUBP1-interacting proteins, HEK293T cells were stably transfected with a pLenti6.2/V5-DEST expression vector containing full-length FUBP1, kindly gifted to us from the La Baer lab (Arizona State University). Control cells were transfected with an empty vector pLenti6.2/V5-DEST lentivirus (ThermoFisher). Cells were selected for blasticidin resistance and cellular lysates were pre-blocked with Protein A Magnetic Beads (Pierce, Waltham, MA) and subsequently incubated with anti-V5 antibody. Protein A Magnetic Beads were used to immunoprecipitate V5-bound proteins, and samples were eluted in NuPAGE LDS Sample Buffer (ThermoFisher Scientific, Waltham, MA), followed by SDS-PAGE and standard immunoblotting procedure. For protein mass spectrometry to identify FUBP1-interacting proteins, FUBP1-V5 IP and empty vector (EV)-V5 lysates were separated by SDS-PAGE, fixed in the gel, stained with a 0.3% Coomassie Blue R250 solution, then destained overnight. Large (50-250kD), medium (30-50kD) and small (10-30kD) bands were excised, digested, and analyzed by liquid chromatography-tandem-mass spectrometry (Taplin Mass Spectrometry Facility, Harvard Medical School). The accepted list of interacting proteins was obtained by subtracting common contaminants (CRAPome), and only including proteins that uniquely appeared with  $\geq 6$  unique peptides in at least 2/3 experiments, compared to empty vector control.

### Dot blot assays, and m<sup>6</sup>A IP-IB assays

For dot blot assays, poly(A) RNA was purified from total RNA using DynaBeads mRNA Purification Kit (ThermoFisher, Waltham, MA). Poly(A) RNA was serially diluted to 180 ng/ $\mu\text{l}$ , 45 ng/ $\mu\text{l}$ , 11.25 ng/ $\mu\text{l}$ . Each dilution was dotted (2.5 $\mu\text{l}$ ) on a BrightStar-Plus positively charged nylon membrane (Invitrogen, Carlsbad, CA) in duplicate. The poly(A) RNA was crosslinked to the membrane in a Stratalinker 2400 Crosslinker twice (1,200  $\mu\text{J}$ ) and the membrane was washed for 5 min in wash buffer (PBS, 0.02% Tween-20) before blocking for 1 hr (PBS, 5% Milk, 0.02% Tween-20). The membrane was incubated overnight at 4°C in polyclonal rabbit anti-m<sup>6</sup>A antibody diluted in blocking buffer. Treatment with secondary antibody was performed according to standard immunoblotting procedures and m<sup>6</sup>A detection was visualized using enhanced chemiluminescence. Levels of m<sup>6</sup>A were quantified by measuring density of dots using Fiji ImageJ. To immunoprecipitate proteins that bind m<sup>6</sup>A-modified and unmodified RNA, protocol was followed as described by Domissini et al. (2012). Samples were separated by SDS-PAGE and immunoblotting by standard procedures followed.

### RNA isolation and RNA-seq

Total RNA was extracted using the MiRNeasy Maxi Kit (QIAGEN). Sequencing libraries were prepared using the TruSeq Stranded mRNA kit and samples were sequenced by the Illumina HiSeq 2500 system. For paired end sequencing, the Rapid PE150 flow cell was used.

### m<sup>6</sup>A-RIP qPCR

Poly(A) RNA was purified from total RNA using DynaBeads mRNA Purification Kit (ThermoFisher Scientific). Poly(A) RNA was fragmented using the NEBNext Magnesium RNA Fragmentation Module (NEB) according to manufacturer's protocol. The fragmentation reaction was stopped with 50 mM Fragmentation Stop Solution (NEB) and one round of ethanol precipitation was used for RNA cleanup: fragmented RNA was combined with sodium acetate, linear acrylamide, and 100% ethanol. Fragmented poly(A) RNA was incubated with 1  $\mu\text{l}$  EpiMark anti-m<sup>6</sup>A antibody (NEB) pre-bound to pre-washed Protein G magnetic beads (NEB) in reaction buffer (150 mM NaCl, 10 mM Tris-HCl, pH 7.5, 0.1% NP-40). m<sup>6</sup>A-bound beads were washed twice in reaction buffer, then twice in low salt reaction buffer (50 mM NaCl, 10 mM Tris-HCl, pH 7.5, 0.1% NP-40) and then two washes in high salt reaction buffer (500 mM NaCl, 10 mM Tris-HCl, pH 7.5, 0.1% NP-40). Immunoprecipitated RNA was eluted in 30  $\mu\text{l}$  Buffer RLT (QIAGEN), then

cleaned and concentrated with Dynabeads MyOne Silane (ThermoFisher) according to manufacturer's protocol. Bound RNA was eluted in DEPC water and used for first-strand cDNA synthesis using ProtoScript II First Strand cDNA Synthesis Kit (NEB). cDNA was also generated from total RNA, representing the input for the RIP.

Three-step qPCR amplification was performed using SYBR Green Supermix (BioRad) on a CFX96 Real-time Thermal Cycler (BioRad). Threshold cycle numbers were converted to relative gene expression values using the  $2^{-\Delta\Delta C_t}$  method.

## QUANTIFICATION AND STATISTICAL ANALYSIS

### RNA-Seq Analyses

Raw sequencing data were aligned using RSEM using a human hg38 library and differential expression was performed with EBSeq (Leng et al., 2013; Leng et al., 2013). STAR (Dobin et al., 2013) was used to align raw seq files with the most current reference human genome (hg38). To identify differential alternative splicing events between the control and FUBP1 null samples tested, STAR output was then used to run rMATS4.0.1 (Shen et al., 2014), which generated 5 individual output files that annotated and statistically analyzed the five different kinds of splicing events (A5SS, A3SS, SE, MXE, and RI). Only splicing events with a p value < 0.001 were considered statistically significant. Sashimi plots were generated using `rmats2sashimipLOT` (<https://github.com/Xinglab/rmats2sashimipLOT>).

EBSeq output was used for functional clustering and universal gene enrichment analyses of differentially expressed genes in sequenced sgNTC and sgFUBP1 RNA. The R package `clusterProfiler` (Yu et al., 2012, 2017) was used with the MSigDB collection of annotated gene sets (Leng et al., 2013) to detect the most significantly enriched functions among the gene list of interest, which contained the top up and downregulated (FDR  $\leq$  0.05, log<sub>2</sub> fold change  $\geq$  |1.5|) genes between the sgNTC and sgFUBP1 samples. GO and KEGG annotation data for *Homo sapiens* was downloaded from the R package Bioconductor (Gentleman et al., 2004; Huber et al., 2015) and the `groupGO` function in `clusterProfiler` was used to functionally cluster the gene list. Gene Set Enrichment Analysis (GSEA) (Subramanian et al., 2005) was performed with the same gene list that was used for `clusterProfiler`, generated in a ranked .rnk format.

For bioinformatic analysis and identification of putative m<sup>6</sup>A peaks, sequence data were downloaded from the Gene Expression Omnibus (GEO), dataset GSE37005. Alignment data were obtained by following a previously published protocol for m<sup>6</sup>A-Seq analysis (Dominissini et al., 2013a).

### Clinical Data Analysis

For detection of alteration frequency of *FUBP1* and other hits from the screen across various human cancers, all 233 studies in cBioPortal ([cbioportal.org](http://cbioportal.org)) encompassing 69,310 samples were used. For analysis of alteration frequency of *FUBP1* and other m<sup>6</sup>A regulators in breast cancer, the METABRIC Nature Communications study encompassing 2,509 breast invasive carcinoma samples was selected (Pereira et al., 2016) and the indicated genes were searched for detection of frequency of copy number and mRNA level alterations.

### Statistical Analysis

The data are presented as mean and SEM from n cells or animals. Comparisons between two groups were performed using a t test. Analyses with three or more groups were performed with a one-way or two-way analysis of variance (ANOVA). Data were analyzed and compared between groups with GraphPad Prism (GraphPad Software, Inc) versions 7 and 8. p < 0.05 was considered statistically significant.

## DATA AND CODE AVAILABILITY

The accession number for the RNA-seq data reported in this paper is GEO: GSE122416. Raw IP/MS data are shown in Table S2.

Cell Reports, Volume 28

## Supplemental Information

**Identification of *FUBP1* as a Long Tail Cancer**

**Driver and Widespread Regulator of Tumor**

**Suppressor and Oncogene Alternative Splicing**

**Jessica S. Elman, Thomas K. Ni, Kristen E. Mengwasser, Dexter Jin, Ania Wronski, Stephen J. Elledge, and Charlotte Kuperwasser**

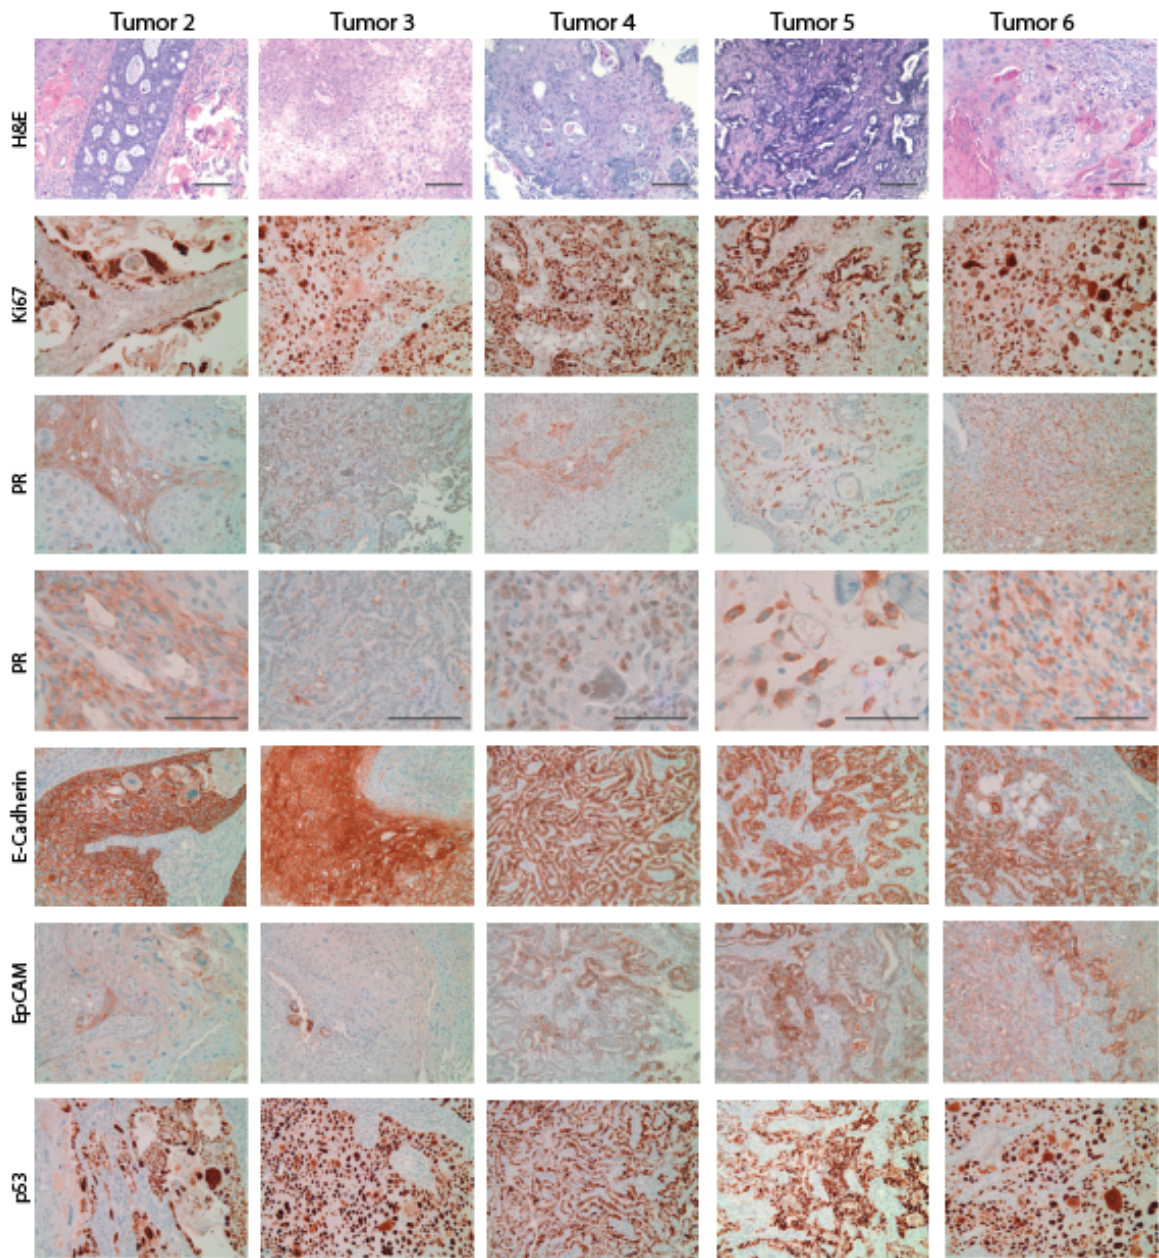

**Supplementary Figure S1. Additional histology of tumors shows variable phenotypes and heterogeneous staining for epithelial, proliferation, and hormone markers, Related to Figure 1. Scale bars = 100  $\mu$ m.**

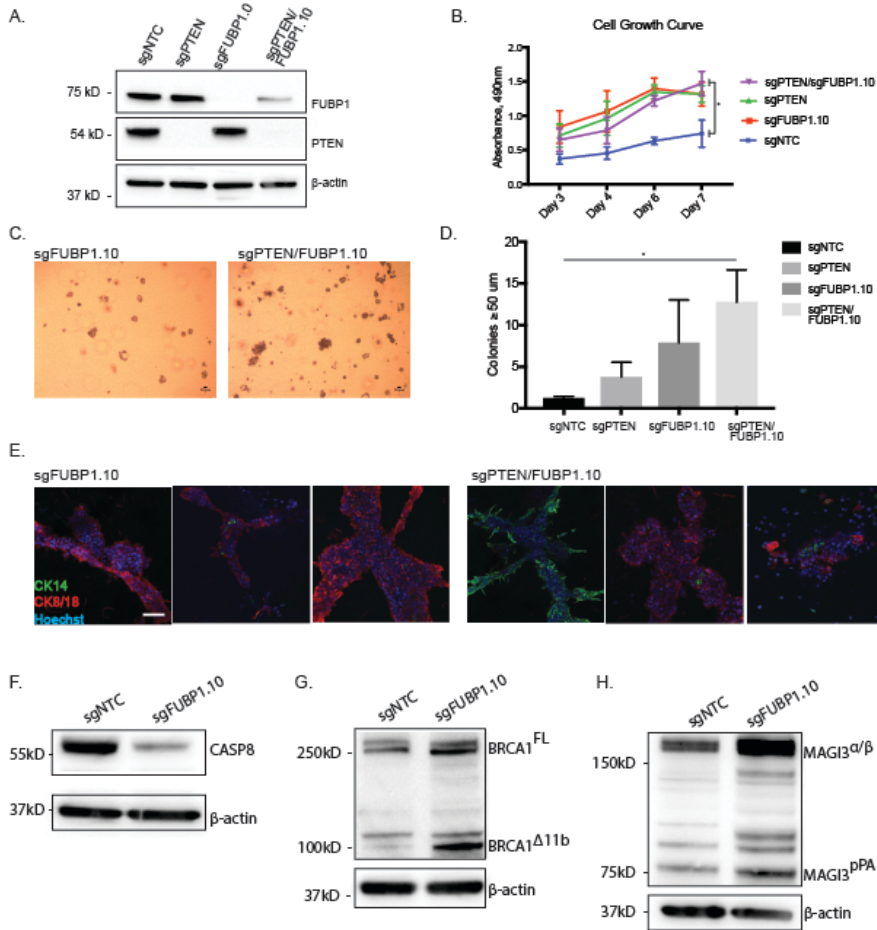

**Supplementary Figure S2. Transformed phenotype in MCF10F cells generated with an alternative FUBP1-targeting sgRNA, Related to Figures 2 and 3.** (A) Western blot of lysates from MCF10F cells transduced with NTC, PTEN, FUBP1, or PTEN + FUBP1 CRISPR-Cas9 sgRNA to show knockout of corresponding genes. (B) Proliferation of the indicated cell lines over 7 days, measured by MTS assay, analyzed with an ANOVA with a multiple comparisons test. (C) Soft agar growth assays for the indicated cell lines. Images show representative soft agar fields for the indicated cell lines after two weeks. Scale bar represents 50  $\mu\text{m}$ . Analyzed with one-way ANOVA with a multiple comparisons test against sgNTC. (D) Quantification of soft agar colonies in the indicated cell lines after two weeks. (E) Representative IF images of the indicated cell lines after 10 days in hydrogels. Green = CK14<sup>+</sup>, Red = CK8/18<sup>+</sup>. Nuclei stained with Hoechst (blue). Scale bars represent 100  $\mu\text{m}$ . (F-H) Validation of alternative splice events in FUBP1-null MCF10F cells generated with an alternative FUBP1-targeting sgRNA. Data are presented as mean  $\pm$  SEM, n = 3 biological replicates per cell line. \*p < 0.05 (two-tailed Student's t-tests).



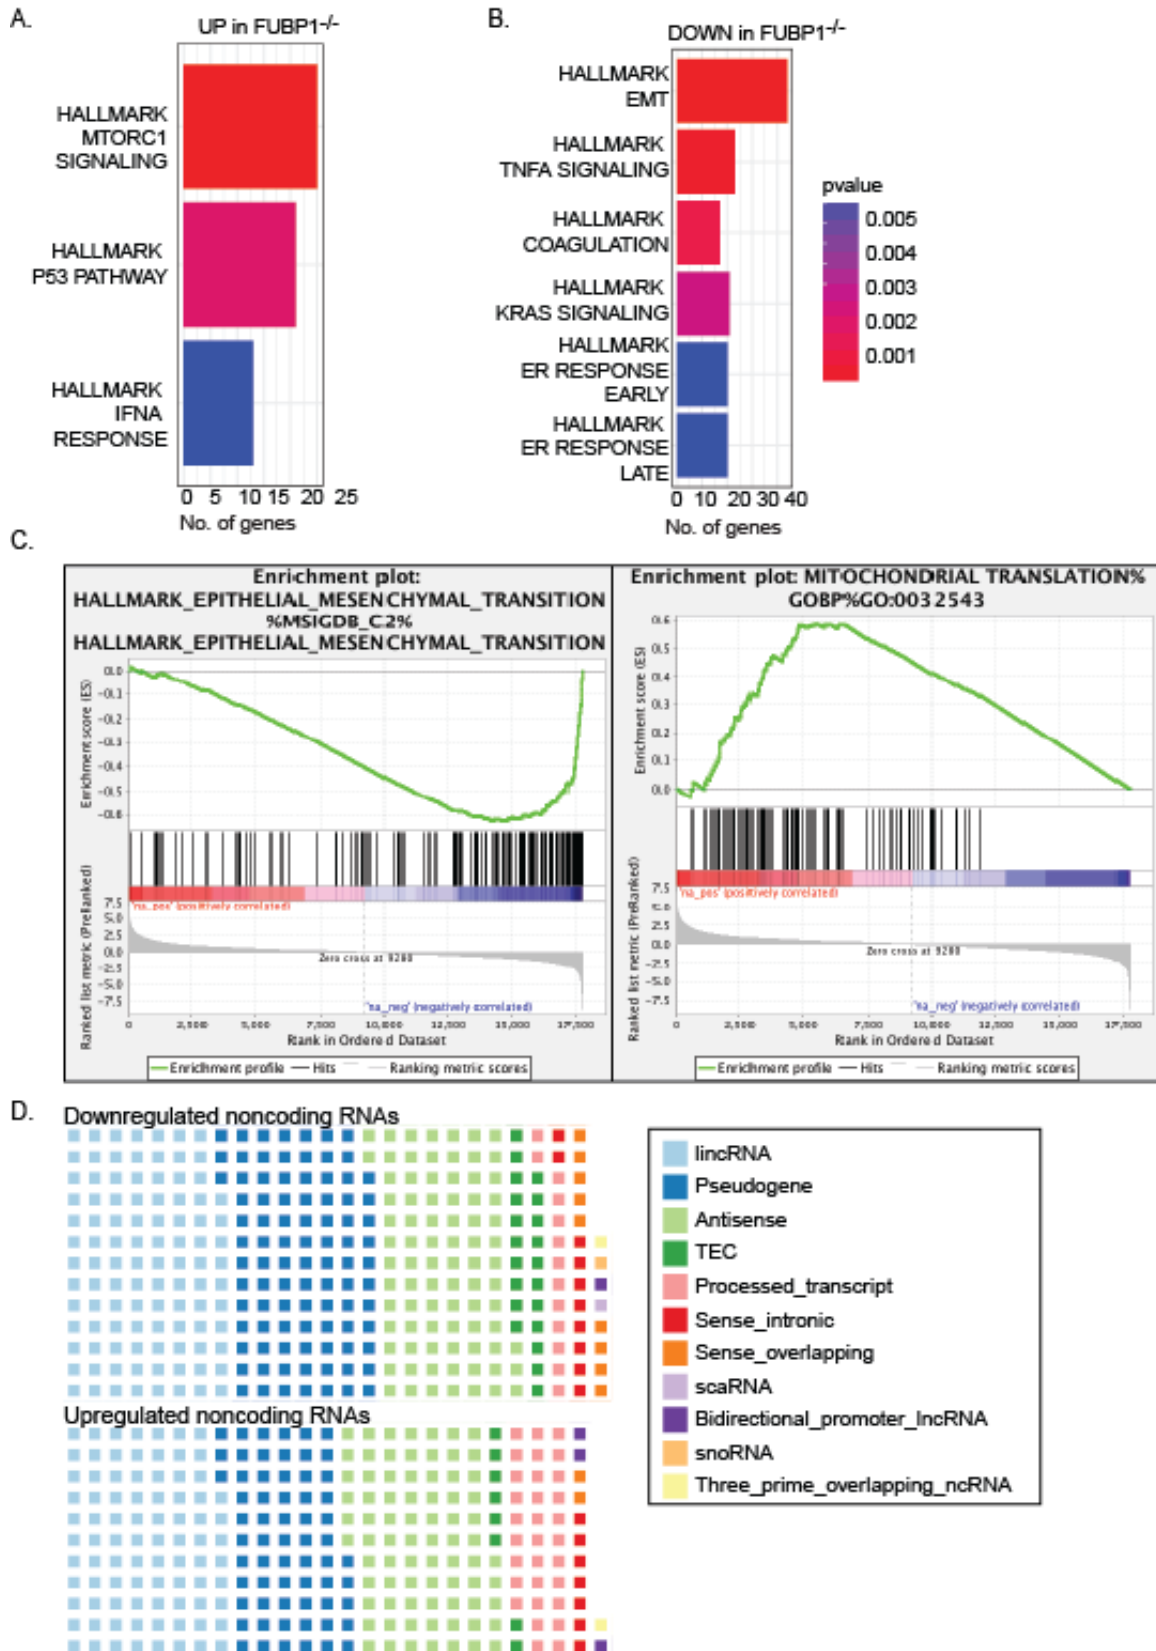

Supplementary Figure S3. FUBP1 loss results in stress-related signaling, Related to

**Figure 3.** (A) Universal gene enrichment analysis was performed and visualized with the R package clusterProfiler using the MSigDB collection of annotated gene sets for up-regulated and (B) down-regulated genes in *FUBP1*-null cells. The most significantly upregulated genes in *FUBP1*-null cells were enriched for signaling related to mTORC, p53, and IFN- $\alpha$  pathways. The most significantly downregulated genes were enriched for pathways related to epithelial to mesenchymal transition (EMT), TNF- $\alpha$ , KRAS, and estrogen response signaling. (C) GSEA analysis of up- and down-regulated genes in *FUBP1*-null cells revealed strong negative enrichment for EMT-related genes (*TGFBI*, *SNAI2*, *MFAP5*) (D) Waffle plot illustrating distribution of significantly non-coding RNAs among up and down-regulated genes in *FUBP1*-null cells (FDR  $\leq$  0.05, log<sub>2</sub> fold change  $\geq$  |1.5|).

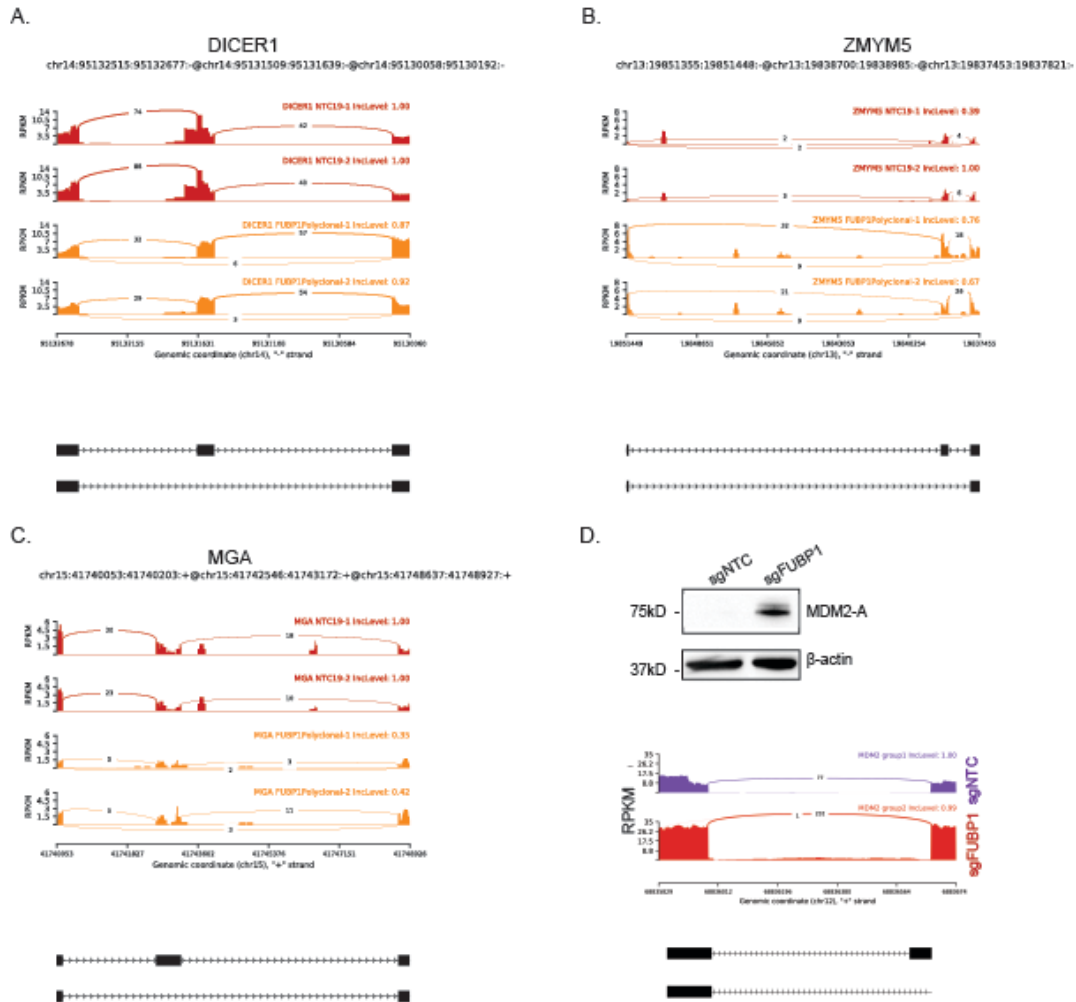

**Supplementary Figure S4. Additional alternative splicing events in *FUBP1*-null and NTC cells, Related to Figure 3.** (A-C) Sashimi plots for alternative splicing of *DICER1*, *ZMYM5*, and *MGA* in NTC and *FUBP1*-null cells. Per-base expression is plotted on y-axis, genomic coordinates on x-axis, and mRNA isoforms are shown on bottom (exons in black, introns as lines with arrow-heads). (D) Western blots of NTC and *FUBP1*-null cell lysates for MDM2 and corresponding sashimi plot of alternative splicing. Y-axis represents a modified reads per kilobase of transcript (RPKM), per a million mapped reads. Peaks indicate number of junction reads. Below, annotation of alternative isoforms.

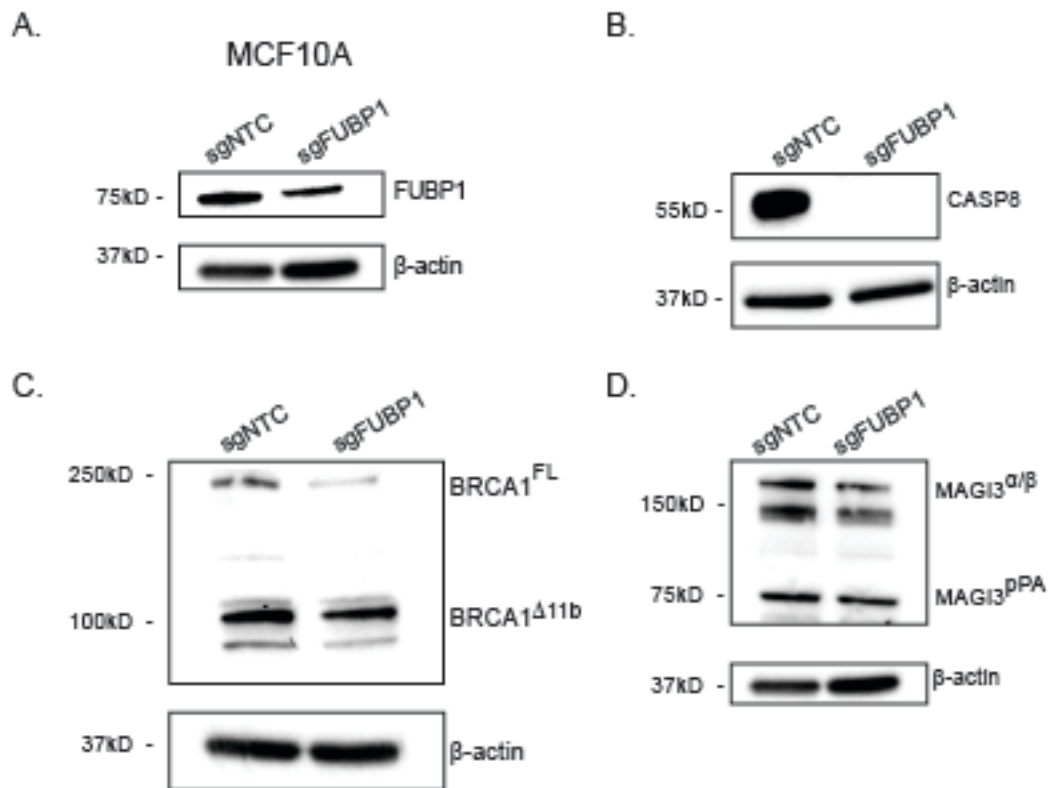

**Supplementary Figure S5. Assessment of alternative splice events in FUBP1-null MCF10A cells, Related to Figure 3.** (A) Western blot of lysates from MCF10A cells transduced with NTC or FUBP1 CRISPR-Cas9 sgRNA to show knockout of FUBP1. (B-D) Western blot of lysates from NTC and FUBP1-null MCF10A cells to show alternative splicing of corresponding proteins.

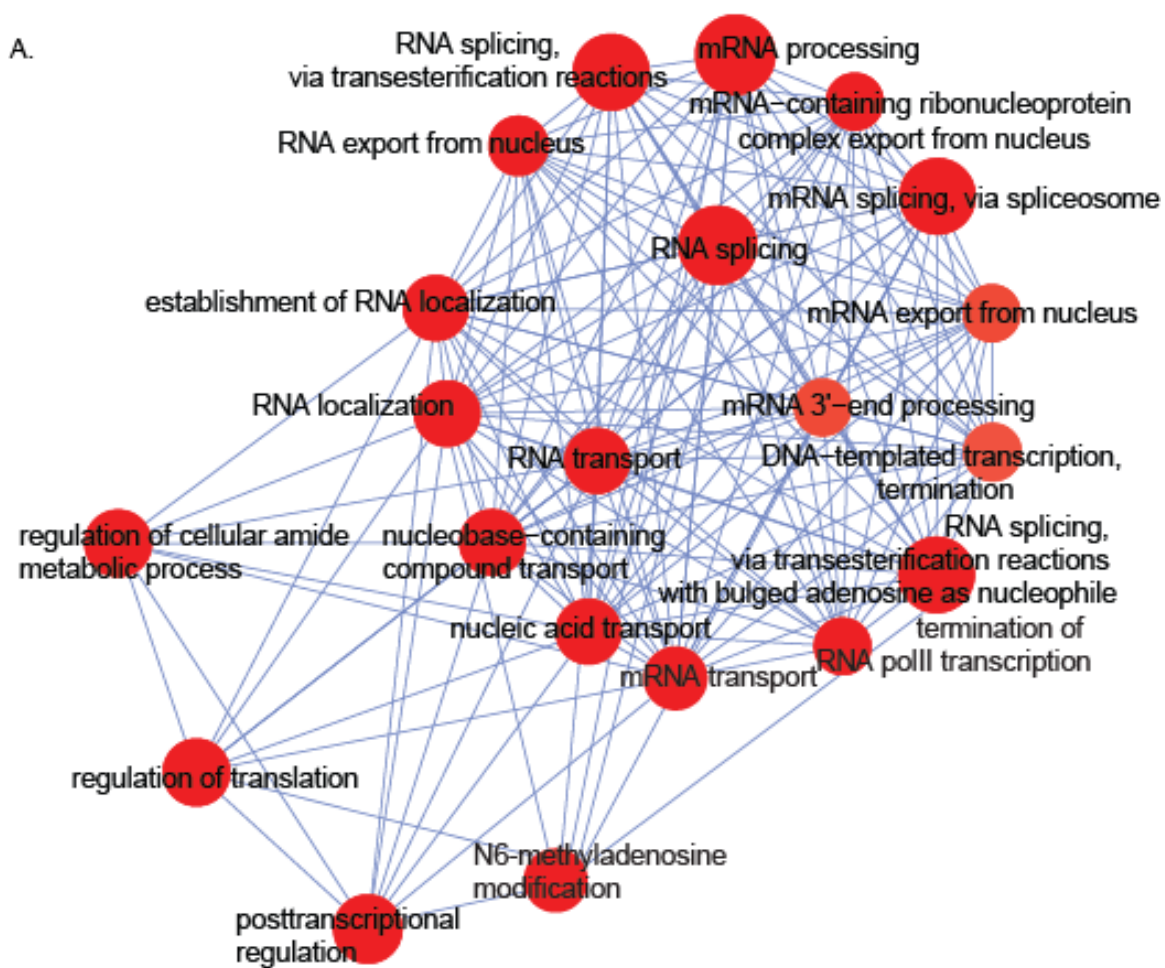

B.

| Protein name | # unique peptides | Out of 3 experiments |
|--------------|-------------------|----------------------|
| RBM15*       | 15                | 3                    |
| ELAVL1*      | 11                | 3                    |
| SYNCRIP      | 20                | 3                    |
| DHX36        | 16                | 3                    |
| MATR3*       | 22                | 2                    |
| HNRNPA2B1*   | 22                | 2                    |
| IGF2BP1*     | 17                | 2                    |
| HNRNPR       | 18                | 2                    |
| VIRMA*       | 18                | 2                    |

\*Validated with IP/IB

**Supplementary Figure S6. Functional clustering of proteins that co-immunoprecipitated with FUBP1, detected by IP/MS, Related to Figure 4.** (A) The R package clusterProfiler was used to create a network that groups proteins based on biological process using the “enrichGO” function with a Benjamini & Hochberg adjustment method and a p value cutoff of 0.01. The network was generated with the

“enrichMap” command in clusterProfiler to show the top 20 enriched biological processes among proteins that uniquely co-immunoprecipitated with FUBP1. (B) Table summarizing proteins related to m<sup>6</sup>A modification that co-immunoprecipitated with FUBP1-V5, detected by IP/MS in 3/3 (orange) or 2/3 (yellow) experiments.

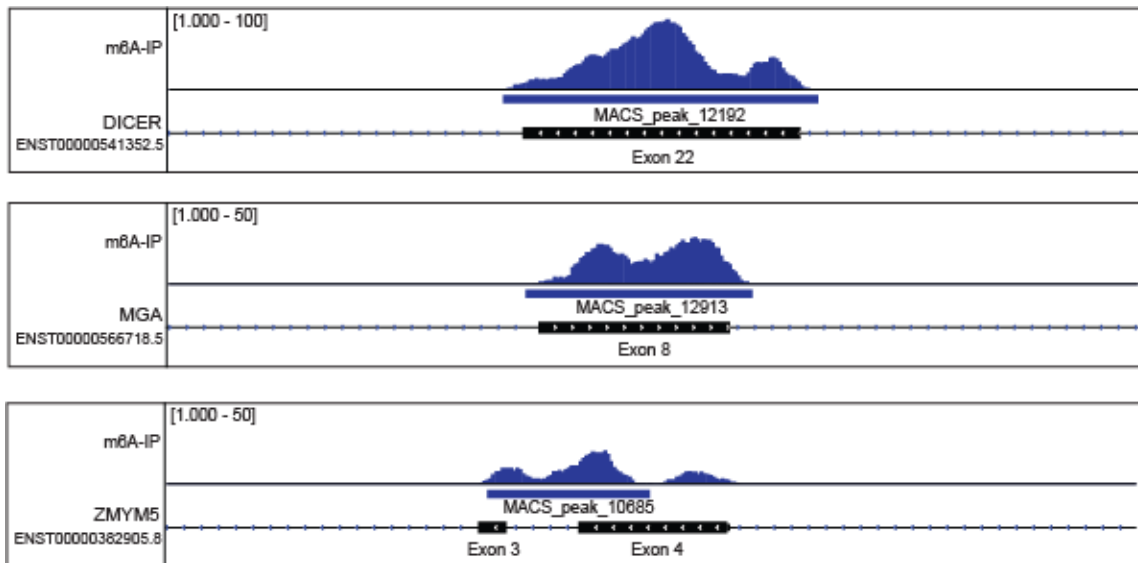

**Supplementary Figure S7. Distribution of m<sup>6</sup>A-Seq peaks across the DICER1, MGA, and ZMYM5 loci, Related to Figure 4.** Based on analysis of previously published m<sup>6</sup>A-Seq data in HepG2 cells. The locations of the putative m<sup>6</sup>A sites are indicated within exons directly upstream of splice sites yielding AS transcripts found in FUBP1-null cells
